# Supplementary material for: Probing the dynamics of the photo-induced decarboxylation of neutral and ionic pyruvic acid
Source: Royal Society of Chemistry journal article supplement (doi:10.1039/d2fd00023g), 2022-01-01
Supplement: d2fd00023g1.pdf [file d2fd00023g1.pdf]

## Supplementary Material

### Probing the dynamics of the photo-induced decarboxylation of neutral and ionic pyruvic acid

M. Jarraya, A. Bellili, L. Barreau, D. Cubaynes, G. A. Garcia, L. Poisson, M. Hochlaf

---

Authors for correspondance :

\*emails: [lionel.poisson@universite-paris-saclay.fr](mailto:lionel.poisson@universite-paris-saclay.fr) (L.P.); [majdi.hochlaf@univ-eiffel.fr](mailto:majdi.hochlaf@univ-eiffel.fr) (M.H.)

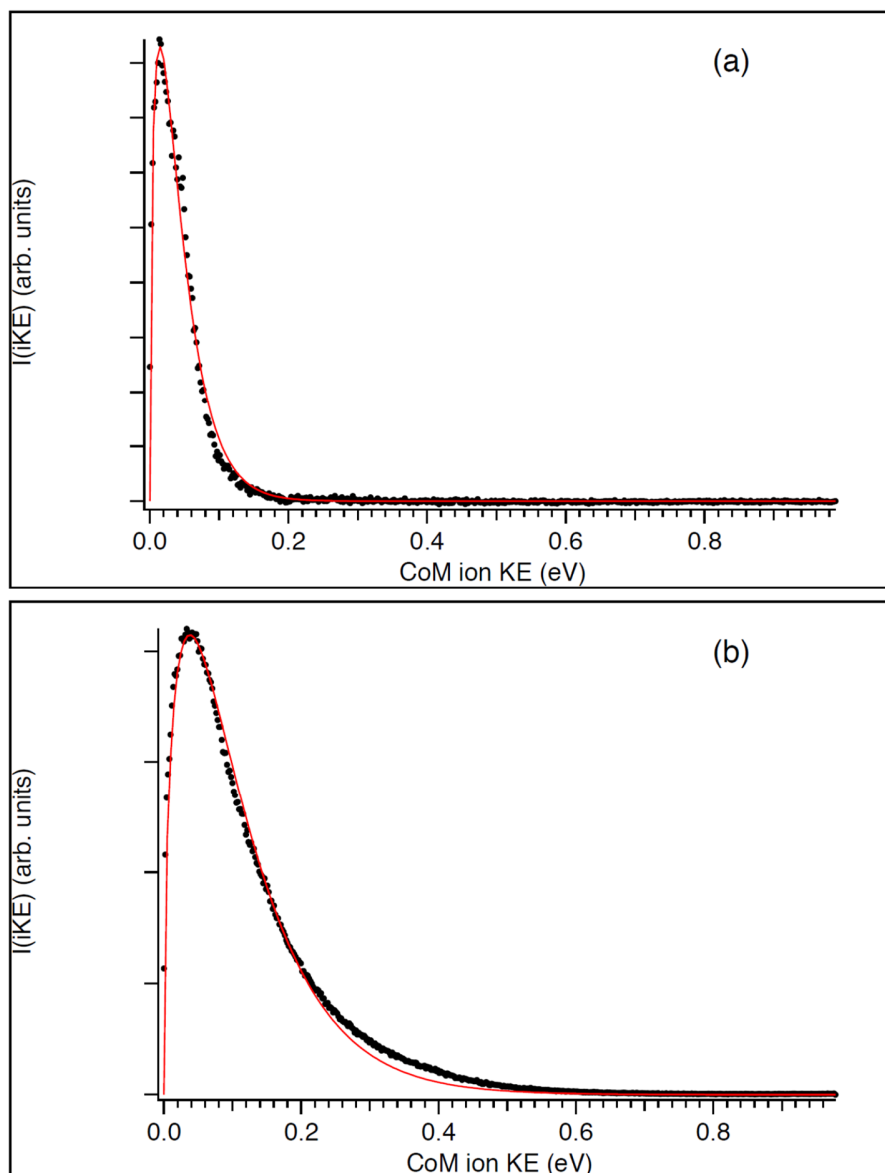

**Figure S1:** Ion kinetic energy distributions for fragments  $m/z$  87 (a) and  $m/z$  43 (b). The energy axis is given in center of mass assuming parent masses of  $m/z$  176 (PA dimer) and  $m/z$  88 for (a) and (b) respectively. The black points represent the experimental data while the red curves are the result of a fit assuming a Boltzmann distribution with translational temperatures of 330K and 876K for (a) and (b). The good agreement with a Boltzmann distribution points to a statistical fragmentation as opposed to a direct dissociation from a repulsive state. Note that a bad fitting is obtained for  $m/z = 87$  fragment is coming from  $PA^+$  monomer. CoM is for center of mass.

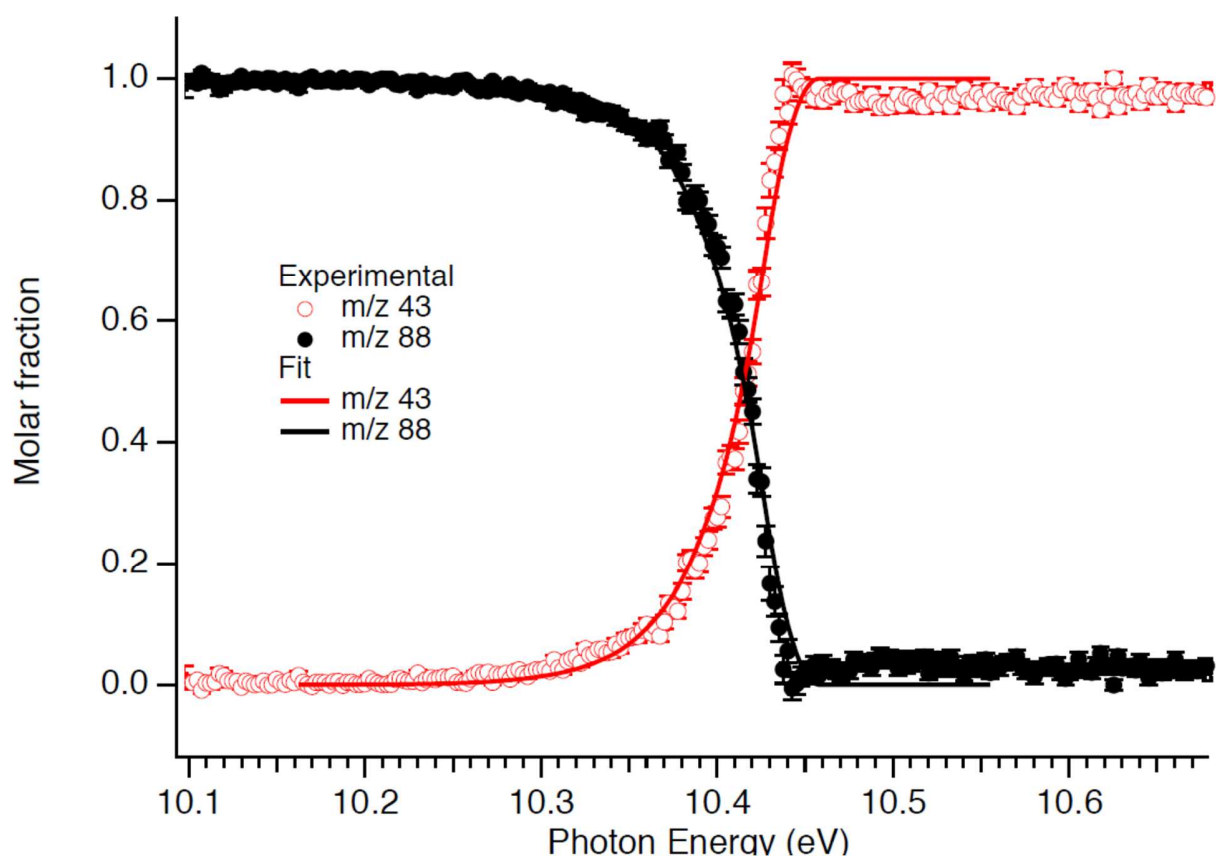

**Figure S2:** Breakdown diagram showing the branching ratio of parent ( $m/z$  88) and fragment ( $m/z$  43) ions as a function of photon energy. Because the ratios are obtained from the mass selected TPES curves, the photoelectron takes no energy and the photon energy equals the energy deposited into the molecule. The solid and open circles represent the experimental data while the solid lines are the result of a statistical model which considers the initial thermal energy of the molecule (see main text for details). The temperature defining this thermal energy, as well as the appearance energy of the  $m/z$  43 fragment at 0K are varied and extracted using a least squared fit to the data.

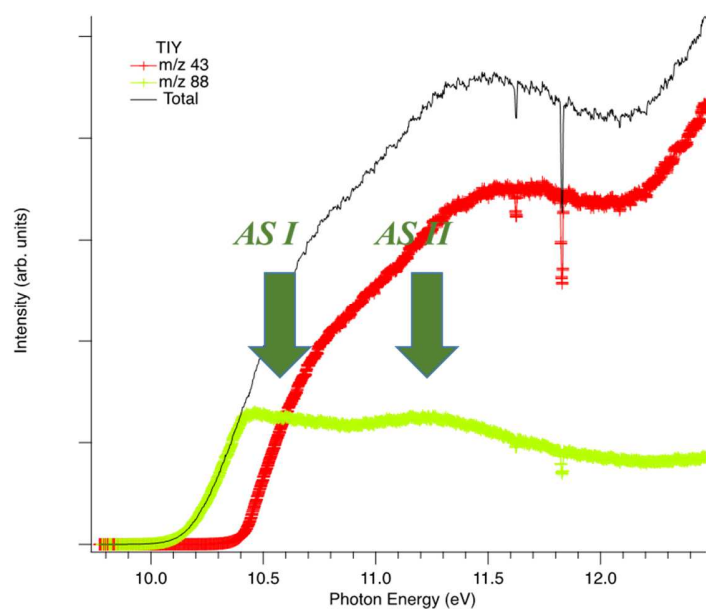

**Figure S3:** Total ion yield (TIY) of Tc pyruvic acid isomer and ion yield of m/z 43 and 88.

**Table S1:** Total energies (in Hartree) of Pyruvic acid and the resulting cation. ZPE (in kJ/mol) is evaluated at the PBE0/aug-cc-pVDZ level using the corresponding anharmonic frequencies. PBE0 computations correspond to optimization and the other computations are single point computations. The corresponding Cartesian coordinates and the harmonic frequencies are given in Tables S18 and S20, respectively.

|                                 | Tc             | Tc <sup>+</sup> | Tt                    | Tt <sup>+</sup> | Ct                    |
|---------------------------------|----------------|-----------------|-----------------------|-----------------|-----------------------|
|                                 |                |                 |                       |                 |                       |
| PBE0/aug-cc-pVDZ                | -342.086476504 | -341.724768314  | -342.081324740        | -341.726522737  | -342.078476602        |
| ZPVE/ PBE0/aug-cc-pVDZ (kJ/mol) | 185.84         | 178.80          | 185.10                | 178.97          | 184.87                |
| (R)CCSD(T)-F12/cc-pVTZ-F12      | -342.04898277  | -341.67769851   | -342.04462661         | -341.67835633   | -342.04202977         |
| (R)CCSD(T,fc)/cc-pwCVTZ         | -342.23182247  | -341.86720520   | -342.22750924         | -341.86783717   | -342.22480717         |
| (R)CCSD(T,full)/cc-pwCVTZ       | -341.92772794  | -341.56323818   | -341.92344888         | -341.56412647   | -341.92075582         |
| (R)CCSD(T)/cc-pVTZ              | -341.90541494  | -341.54117241   | -341.90119356         | -341.54187799   | -341.89850796         |
| (R)CCSD(T)cc-pVTZ-DK            | -341.88955326  | -341.52529570   | -341.88532564         | -341.52601634   | -341.88263860         |
|                                 | Cc             | enolPACc        | enolPACc <sup>+</sup> | enolPATc        | enolPATc <sup>+</sup> |
|                                 |                |                 |                       |                 |                       |
| PBE0/aug-cc-pVDZ                | 342.068238100  | -342.077856035  | -341.741445179        | -342.072898088  | -341.737598714        |
| ZPVE/ PBE0/aug-cc-pVDZ (kJ/mol) | 183.06         | 189.06          | 185.93                | 187.96          | 185.70                |
| (R)CCSD(T)-F12/cc-pVTZ-F12      | -342.03191335  | -342.03974625   | -341.69296111         | -342.03539086   | -341.68952301         |
| (R)CCSD(T,fc)/cc-pwCVTZ         | -342.21449512  | -342.22162304   | -341.88096760         | -342.21739421   | -341.87737596         |

|                                 |                                                                                   |                                                                                     |                                                                                     |               |               |
|---------------------------------|-----------------------------------------------------------------------------------|-------------------------------------------------------------------------------------|-------------------------------------------------------------------------------------|---------------|---------------|
| (R)CCSD(T,full)/cc-pwCVTZ       | -341.91046303                                                                     | -341.91730928                                                                       | -341.57717551                                                                       | -341.91309781 | -341.57358080 |
| (R)CCSD(T)/cc-pVTZ              | -341.88813825                                                                     | -341.89520339                                                                       | -341.55533006                                                                       | -341.89097460 | -341.55172501 |
| (R)CCSD(T)cc-pVTZ-DK            | -341.87227606                                                                     | -341.87934374                                                                       | -341.53950723                                                                       | -341.87511680 | -341.53590112 |
|                                 | enolPATt                                                                          | enolPACt                                                                            | enolPACt <sup>+</sup>                                                               |               |               |
|                                 | 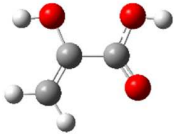 |  |  |               |               |
| PBE0/aug-cc-pVDZ                | -342.068778205                                                                    | -342.068291547                                                                      | -341.726442871                                                                      |               |               |
| ZPVE/ PBE0/aug-cc-pVDZ (kJ/mol) | 187.89                                                                            | 187.71                                                                              | 184.81                                                                              |               |               |
| (R)CCSD(T)-F12/cc-pVTZ-F12      | -342.03142836                                                                     | -342.03110252                                                                       | -341.67886667                                                                       |               |               |
| (R)CCSD(T,fc)/cc-pwCVTZ         | -342.21348412                                                                     | -342.21298144                                                                       | -341.86663954                                                                       |               |               |
| (R)CCSD(T,full)/cc-pwCVTZ       | -341.90921906                                                                     | -341.90870646                                                                       | -341.56290703                                                                       |               |               |
| (R)CCSD(T)/cc-pVTZ              | -341.88712025                                                                     | -341.88661792                                                                       | -341.54108116                                                                       |               |               |
| (R)CCSD(T)cc-pVTZ-DK            | -341.87125975                                                                     | -341.87076084                                                                       | -341.52525843                                                                       |               |               |

**Table S2:** relative energies ( $E_r$ , eV) of Pyruvic acid with respect to the Tc isomer ground state.  $\Delta ZPE$  (in eV) is evaluated at the PBE0/aug-cc-pVDZ level using the corresponding anharmonic frequencies.  $\Delta CV$  and  $\Delta SR$  are for core valence and scalar relativistic effects.

|                                                                                                                | Tc | Tt           | Ct           | Cc         | enolPACc      | enolPATc    | enolPATt      | enolPACt     |
|----------------------------------------------------------------------------------------------------------------|----|--------------|--------------|------------|---------------|-------------|---------------|--------------|
| $E_r(\text{PBE0/aug-cc-pVDZ (opt) // (R)CCSD(T)-F12 /cc-pVTZ-F12})$                                            | 0  | 0.119        | 0.189        | 0.464      | 0.251         | 0.370       | 0.478         | 0.487        |
| $\Delta CV$                                                                                                    | 0  | -0.000929814 | -0.001174988 | -0.0017    | 0.005965555   | 0.005493165 | 0.00464036    | 0.004910297  |
| $\Delta SR$                                                                                                    | 0  | 0.000169799  | 0.000208984  | 0.0000139  | -0.0000552391 | -0.00010558 | -0.0000321095 | -0.000125172 |
| $\Delta ZPVE$                                                                                                  | 0  | -0.00766956  | -0.0100533   | -0.0288127 | 0.033373      | 0.021972    | 0.021247      | 0.019381     |
| $E_r(\text{PBE0/aug-cc-pVDZ (opt) // (R)CCSD(T)-F12/cc-pVTZ-F12 +}\Delta CV+\Delta SR+\Delta ZPVE(\text{SP}))$ | 0  | 0.110        | 0.178        | 0.434      | 0.291         | 0.397       | 0.504         | 0.511        |

**Table S3:** Relative energies ( $E_r$ , eV) of Pyruvic acid cation with respect to the  $Tc^+$  isomer ground state.  $\Delta ZPE$  (in eV) is evaluated at the PBE0/aug-cc-pVDZ level using the corresponding anharmonic frequencies.  $\Delta CV$  and  $\Delta SR$  are for core valence and scalar relativistic effects.

|                                                                                                                   | $Tc^+$ | $Tt^+$       | enolPACc <sup>+</sup> | enolPATc <sup>+</sup> | enolPACt <sup>+</sup> |
|-------------------------------------------------------------------------------------------------------------------|--------|--------------|-----------------------|-----------------------|-----------------------|
| $E_r$ (PBE0/aug-cc-pVDZ (opt) //<br>(R)CCSD(T)-F12 /cc-pVTZ-F12)                                                  | 0      | -0.018       | -0.415                | -0.322                | -0.032                |
| $\Delta CV$                                                                                                       | 0      | -0.006974826 | -0.00476009           | -0.004676551          | -0.006381345          |
| $\Delta SR$                                                                                                       | 0      | -0.000409804 | -0.00146615           | -0.001437306          | -0.001468871          |
| $\Delta ZPVE$                                                                                                     | 0      | 0.0017619    | 0.073897              | 0.07151               | 0.062289              |
| $E_r$ (PBE0/aug-cc-pVDZ (opt) //<br>(R)CCSD(T)-F12 /cc-pVTZ-F12 + $\Delta CV$ + $\Delta SR$ + $\Delta ZPVE$ (SP)) | 0      | -0.024       | -0.348                | -0.256                | 0.023                 |



**Table S4:** Total energies (in Hartree) of the  $(H + X)^+$  fragmentation pathways of the resulting cation of Pyruvic acid. ZPE (in kJ/mol) is evaluated at the PBE0/aug-cc-pVDZ level using the corresponding anharmonic frequencies. PBE0 computations correspond to optimization and the other computations are single point computations. The corresponding Cartesian coordinates and the harmonic frequencies are given in Tables S19 and S20, respectively.

|                                 | H                                                                                   | CH <sub>2</sub> -CO-CO <sub>2</sub> H                                               | CH <sub>2</sub> -CO-CO <sub>2</sub> H <sup>+</sup>                                    | CH <sub>3</sub> -CO-CO <sub>2</sub>                                                   | CH <sub>3</sub> -CO-CO <sub>2</sub> <sup>+</sup>                                      |
|---------------------------------|-------------------------------------------------------------------------------------|-------------------------------------------------------------------------------------|---------------------------------------------------------------------------------------|---------------------------------------------------------------------------------------|---------------------------------------------------------------------------------------|
|                                 |    |  |    |    |    |
| PBE0/aug-cc-pVDZ                | -0.5006506                                                                          | -341.432017372                                                                      | -341.125342721                                                                        | -341.400558850                                                                        | -341.013858913                                                                        |
| ZPVE/ PBE0/aug-cc-pVDZ (kJ/mol) | 0                                                                                   | 153.01                                                                              | 161.11                                                                                | 146.96                                                                                | 151.73                                                                                |
| (R)CCSD(T)-F12/cc-pVTZ-F12      | -0.49994621                                                                         | -341.38664607                                                                       | -341.08018252                                                                         | -341.30942010                                                                         | -340.96849445                                                                         |
| (R)CCSD(T,fc)/cc-pwCVTZ         | -0.49980981                                                                         | -341.57067566                                                                       | -341.27001292                                                                         | -341.49427191                                                                         | -341.15919882                                                                         |
| (R)CCSD(T,full)/cc-pwCVTZ       | -0.49980981                                                                         | -341.26681262                                                                       | -340.96652100                                                                         | -341.18861941                                                                         | -340.85601276                                                                         |
| (R)CCSD(T)/cc-pVTZ              | -0.49980981                                                                         | -341.24457512                                                                       | -340.94435547                                                                         | -341.16691727                                                                         | -340.83369349                                                                         |
| (R)CCSD(T)cc-pVTZ-DK            | -0.49980981                                                                         | -341.22871105                                                                       | -340.92856221                                                                         | -341.15166991                                                                         | -340.81780522                                                                         |
|                                 | CH <sub>2</sub> -CO-CO <sub>2</sub> H-1                                             |                                                                                     | CH <sub>2</sub> -CO-CO <sub>2</sub> H-2                                               | CH <sub>2</sub> -CO-CO <sub>2</sub> H-2 <sup>+</sup>                                  | CH <sub>2</sub> -COH-CO <sub>2</sub>                                                  |
|                                 |  |                                                                                     |  |  |  |
| PBE0/aug-cc-pVDZ                | -341.423995565                                                                      |                                                                                     | -341.426983789                                                                        | -341.124678769                                                                        | -341.395330417                                                                        |
| ZPVE/ PBE0/aug-cc-pVDZ (kJ/mol) | 151.45                                                                              |                                                                                     | 151.94                                                                                | 160.62                                                                                | 150.55                                                                                |

|                                 |                                                                                   |                                                                                     |                                                                                     |               |               |
|---------------------------------|-----------------------------------------------------------------------------------|-------------------------------------------------------------------------------------|-------------------------------------------------------------------------------------|---------------|---------------|
| (R)CCSD(T)-F12/cc-pVTZ-F12      | -341.37950804                                                                     |                                                                                     | -341.38216726                                                                       | -341.07974919 | -341.29231408 |
| (R)CCSD(T,fc)/cc-pwCVTZ         | -341.56344112                                                                     |                                                                                     | -341.56625806                                                                       | -341.26979519 | -341.47212923 |
| (R)CCSD(T,full)/cc-pwCVTZ       | -341.25961196                                                                     |                                                                                     | -341.26242668                                                                       | -340.96630798 | -341.16802682 |
| (R)CCSD(T)/cc-pVTZ              | -341.23746689                                                                     |                                                                                     | -341.24024583                                                                       | -340.94421458 | -341.14545029 |
| (R)CCSD(T)cc-pVTZ-DK            | -341.22159699                                                                     |                                                                                     | -341.22437580                                                                       | -340.92841929 | -341.12953002 |
|                                 | CH <sub>2</sub> -COH-CO <sub>2</sub> <sup>+</sup>                                 | CH-COH-CO <sub>2</sub> H                                                            | CH-COH-CO <sub>2</sub> H <sup>+</sup>                                               |               |               |
|                                 | 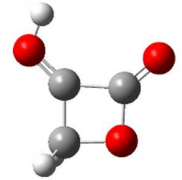 |  |  |               |               |
| PBE0/aug-cc-pVDZ                | -341.104348534                                                                    | -341.388420234                                                                      | -341.058548012                                                                      |               |               |
| ZPVE/ PBE0/aug-cc-pVDZ (kJ/mol) | 159.38                                                                            | 153.52                                                                              | 150.29                                                                              |               |               |
| (R)CCSD(T)-F12/cc-pVTZ-F12      | -341.05663689                                                                     | -341.34397590                                                                       | -341.01497221                                                                       |               |               |
| (R)CCSD(T,fc)/cc-pwCVTZ         | -341.24591947                                                                     | -341.52741355                                                                       | -341.20310189                                                                       |               |               |
| (R)CCSD(T,full)/cc-pwCVTZ       | -340.94240928                                                                     | -341.22342643                                                                       | -340.89942164                                                                       |               |               |
| (R)CCSD(T)/cc-pVTZ              | -340.92028867                                                                     | -341.20129760                                                                       | -340.87713063                                                                       |               |               |
| (R)CCSD(T)cc-pVTZ-DK            | -340.90448484                                                                     | -341.18541638                                                                       | -340.86128181                                                                       |               |               |

**Table S5:** Calculated and measured appearance energies (AEs in eV) of the  $(H + X)^+$  fragmentation pathways of the resulting cation of Pyruvic acid.  $\Delta ZPE$  (in eV) is evaluated at the PBE0/aug-cc-pVDZ level using the corresponding anharmonic frequencies.  $\Delta CV$  and  $\Delta SR$  are for core-valence and scalar relativistic effects. The corresponding Cartesian coordinates and the harmonic frequencies are given in Tables S19 and S20, respectively.

| m/z                                                                                                          | 87                                                     |                                                          |                                                       |                                           |                                                      | 1                                                      |                                                       |                                                      |                                           |                                                          |                                                          |
|--------------------------------------------------------------------------------------------------------------|--------------------------------------------------------|----------------------------------------------------------|-------------------------------------------------------|-------------------------------------------|------------------------------------------------------|--------------------------------------------------------|-------------------------------------------------------|------------------------------------------------------|-------------------------------------------|----------------------------------------------------------|----------------------------------------------------------|
|                                                                                                              | CH <sub>2</sub> -CO-CO <sub>2</sub> H <sup>+</sup> + H | CH <sub>2</sub> -CO-CO <sub>2</sub> H-2 <sup>+</sup> + H | CH <sub>2</sub> -COH-CO <sub>2</sub> <sup>+</sup> + H | CH-COH-CO <sub>2</sub> H <sup>+</sup> + H | CH <sub>3</sub> -CO-CO <sub>2</sub> <sup>+</sup> + H | CH <sub>2</sub> -CO-CO <sub>2</sub> H + H <sup>+</sup> | CH <sub>2</sub> -COH-CO <sub>2</sub> + H <sup>+</sup> | CH <sub>3</sub> -CO-CO <sub>2</sub> + H <sup>+</sup> | CH-COH-CO <sub>2</sub> H + H <sup>+</sup> | CH <sub>2</sub> -CO-CO <sub>2</sub> H-1 + H <sup>+</sup> | CH <sub>2</sub> -CO-CO <sub>2</sub> H-2 + H <sup>+</sup> |
| AE (PBE0/aug-cc-pVDZ (opt) // (R)CCSD(T)-F12 / cc-pVTZ-F12)                                                  | 12.758                                                 | 12.770                                                   | 13.399                                                | 14.533                                    | 15.797                                               | 18.023                                                 | 19.184                                                | 20.124                                               | 19.184                                    | 18.217                                                   | 18.145                                                   |
| $\Delta CV$                                                                                                  | -0.016397862                                           | -0.016526027                                             | -0.0159                                               | -0.011273139                              | -0.02472                                             | -0.0063                                                | -0.00292                                              | 0.042395                                             | -0.002922776                              | -0.007221089                                             | -0.00716068                                              |
| $\Delta SR$                                                                                                  | -0.001861804                                           | -0.001806565                                             | -0.00157                                              | -0.000349939                              | 0.000724                                             | 6.5E-05                                                | 0.000532                                              | -0.01672                                             | 0.000531711                               | 0.000223678                                              | 0.000227215                                              |
| $\Delta ZPVE$                                                                                                | -0.256308                                              | -0.2613869                                               | -0.2742386                                            | -0.3684499                                | -0.3535253                                           | -0.3402591                                             | -0.3349733                                            | -0.4029629                                           | -0.3349733                                | -0.3564273                                               | -0.351349                                                |
| AE (PBE0/aug-cc-pVDZ (opt) // (R)CCSD(T)-F12 / cc-pVTZ-F12 + $\Delta CV$ + $\Delta SR$ + $\Delta ZPVE$ (SP)) | 12.484                                                 | 12.490                                                   | 13.107                                                | 14.153                                    | 15.420                                               | 17.677                                                 | 18.847                                                | 19.747                                               | 18.847                                    | 17.854                                                   | 17.787                                                   |

**Table S6:** Total energies (in Hartree) of the  $(\text{CH}_3\text{CO} + \text{HOCO})^+$  fragmentation pathways of the resulting cation of Pyruvic acid. ZPE (in kJ/mol) is evaluated at the PBE0/aug-cc-pVDZ level using the corresponding anharmonic frequencies. PBE0 computations correspond to optimization and the other computations are single point computations. The corresponding Cartesian coordinates and the harmonic frequencies are given in Tables S19 and S20, respectively.

|                                 | $\text{CH}_3\text{CO}$                                                               | $\text{CH}_3\text{CO}^+$                                                              | HOCO                                                                                  | $\text{HOCO}^+$                                                                       |
|---------------------------------|--------------------------------------------------------------------------------------|---------------------------------------------------------------------------------------|---------------------------------------------------------------------------------------|---------------------------------------------------------------------------------------|
|                                 | 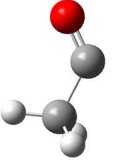   |    |    |    |
| PBE0/aug-cc-pVDZ                | -153.025794052                                                                       | -152.766167246                                                                        | -188.928465476                                                                        | -188.625909802                                                                        |
| ZPVE/ PBE0/aug-cc-pVDZ (kJ/mol) | 111.61                                                                               | 115.17                                                                                | 54.951                                                                                | 56.319                                                                                |
| (R)CCSD(T)-F12/cc-pVTZ-F12      | -152.99792146                                                                        | -152.74339388                                                                         | -188.91661008                                                                         | -188.61952009                                                                         |
| (R)CCSD(T,fc)/cc-pwCVTZ         | -153.09510820                                                                        | -152.84551662                                                                         | -189.00324885                                                                         | -188.71221011                                                                         |
| (R)CCSD(T,full)/cc-pwCVTZ       | -152.94555926                                                                        | -152.69588137                                                                         | -188.84925360                                                                         | -188.55795002                                                                         |
| (R)CCSD(T)/cc-pVTZ              | -152.93574208                                                                        | -152.68578339                                                                         | -188.83641046                                                                         | -188.54499963                                                                         |
| (R)CCSD(T)cc-pVTZ-DK            | -152.92958433                                                                        | -152.67969359                                                                         | -188.82656346                                                                         | -188.53527196                                                                         |
|                                 | $\text{CH}_2\text{COH}$                                                              | $\text{C}_2\text{H}_3\text{O}^+$                                                      | $\text{CH}_2\text{C-OH}$                                                              | $\text{CH}_2\text{C-OH}^+$                                                            |
|                                 |  |  |  |  |
| PBE0/aug-cc-pVDZ                | -153.017159781                                                                       | -152.680884388                                                                        | -152.979195667                                                                        | -152.7039209                                                                          |
| ZPVE/ PBE0/aug-cc-pVDZ (kJ/mol) | 110.31                                                                               | 116.49                                                                                | 111.28                                                                                | 111.94                                                                                |

|                            |               |               |               |               |
|----------------------------|---------------|---------------|---------------|---------------|
| (R)CCSD(T)-F12/cc-pVTZ-F12 | -152.98678057 | -152.65528742 | -152.94945039 | -152.41276303 |
| (R)CCSD(T,fc)/cc-pwCVTZ    | -153.08384131 | -152.75603239 | -153.04603888 | -152.51136496 |
| (R)CCSD(T,full)/cc-pwCVTZ  | -152.93431005 | -152.60692325 | -152.89630230 | -152.36154767 |
| (R)CCSD(T)/cc-pVTZ         | -152.92480241 | -152.59744500 | -152.88674741 | -152.35125870 |
| (R)CCSD(T)cc-pVTZ-DK       | -152.91868223 | -152.59133340 | -152.88062093 | -152.41276303 |

**Table S7:** Calculated and measured appearance energies (AEs in eV) of the  $(\text{CH}_3\text{CO} + \text{HOCO})^+$  fragmentation pathways of the resulting cation of Pyruvic acid.  $\Delta\text{ZPE}$  (in eV) is evaluated at the PBE0/aug-cc-pVDZ level using the corresponding anharmonic frequencies.  $\Delta\text{CV}$  and  $\Delta\text{SR}$  are for core valence and scalar relativistic effects. The corresponding Cartesian coordinates and the harmonic frequencies are given in Tables S19 and S20, respectively.

| m/z                                                                                                                         | 43                               |                                          |                                    | 45                                            |                                                |                                                 |
|-----------------------------------------------------------------------------------------------------------------------------|----------------------------------|------------------------------------------|------------------------------------|-----------------------------------------------|------------------------------------------------|-------------------------------------------------|
|                                                                                                                             | $\text{CH}_3\text{CO}^+$<br>HOCO | $\text{C}_2\text{H}_3\text{O}^+$<br>HOCO | $\text{CH}_2\text{C-OH}^+$<br>HOCO | $\text{CH}_3\text{CO} +$<br>HOCO <sup>+</sup> | $\text{CH}_2\text{COH} +$<br>HOCO <sup>+</sup> | $\text{CH}_2\text{C-OH} +$<br>HOCO <sup>+</sup> |
| AE (PBE0/aug-cc-pVDZ (opt) //<br>(R)CCSD(T)-F12 /cc-pVTZ-F12)                                                               | 10.585                           | 12.982                                   | 19.582                             | 11.743                                        | 12.046                                         | 13.062                                          |
| $\Delta\text{CV}$                                                                                                           | -0.01263                         | -0.026943096                             | -0.007673343                       | -0.00777                                      | -0.008249952                                   | -0.002662908                                    |
| $\Delta\text{SR}$                                                                                                           | 0.002044                         | 0.002637329                              | -1.837286789                       | 0.000646                                      | -0.000376334                                   | -0.000204902                                    |
| $\Delta\text{ZPVE}$                                                                                                         | -0.162916                        | -0.14923516                              | -0.1963926                         | -0.18563448                                   | -0.19910804                                    | -0.18905469                                     |
| AE (PBE0/aug-cc-pVDZ (opt) //<br>(R)CCSD(T)-F12 /cc-pVTZ-F12<br>+ $\Delta\text{CV}+\Delta\text{SR}+\Delta\text{ZPVE}$ (SP)) | 10.411                           | 12.809                                   | 17.540                             | 11.550                                        | 11.838                                         | 12.870                                          |

**Table S8:** Total energies (in Hartree) of the  $(\text{CH}_3 + \text{COCOOH})^+$  fragmentation pathways of the resulting cation of Pyruvic acid. ZPE (in kJ/mol) is evaluated at the PBE0/aug-cc-pVDZ level using the corresponding anharmonic frequencies. PBE0 computations correspond to optimization and the other computations are single point computations. The corresponding Cartesian coordinates and the harmonic frequencies are given in Tables S19 and S20, respectively.

|                                 | $\text{CH}_3$                                                                      | $\text{CH}_3^+$                                                                     | $\text{COCOOH}$                                                                     | $\text{COCOOH}^+$                                                                   |
|---------------------------------|------------------------------------------------------------------------------------|-------------------------------------------------------------------------------------|-------------------------------------------------------------------------------------|-------------------------------------------------------------------------------------|
|                                 | 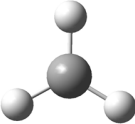 |  |  |  |
| PBE0/aug-cc-pVDZ                | -39.7868782203                                                                     | -39.4220439689                                                                      | -302.142986372                                                                      | -301.848106430                                                                      |
| ZPVE/ PBE0/aug-cc-pVDZ (kJ/mol) | 77.089                                                                             | 82.270                                                                              | 79.128                                                                              | 82.215                                                                              |
| (R)CCSD(T)-F12/cc-pVTZ-F12      | -39.77543764                                                                       | -39.41641199                                                                        | -302.08231892                                                                       | -301.82859162                                                                       |
| (R)CCSD(T,fc)/cc-pwCVTZ         | -39.81103253                                                                       | -39.45360820                                                                        | -302.23031931                                                                       | -301.98463815                                                                       |
| (R)CCSD(T,full)/cc-pwCVTZ       | -39.76275605                                                                       | -39.40604667                                                                        | -301.97450691                                                                       | -301.72957640                                                                       |
| (R)CCSD(T)/cc-pVTZ              | -39.76080467                                                                       | -39.40419450                                                                        | -301.95331057                                                                       | -301.70883029                                                                       |
| (R)CCSD(T)cc-pVTZ-DK            | -39.75999697                                                                       | -39.40338213                                                                        | -301.93823489                                                                       | -301.69376183                                                                       |

**Table S9:** Calculated and measured appearance energies (AEs in eV) of the  $(\text{CH}_3 + \text{COCO}^+\text{OH})^+$  fragmentation pathways of the resulting cation of Pyruvic acid.  $\Delta\text{ZPE}$  (in eV) is evaluated at the PBE0/aug-cc-pVDZ level using the corresponding anharmonic frequencies.  $\Delta\text{CV}$  and  $\Delta\text{SR}$  are for core valence and scalar relativistic effects. The corresponding Cartesian coordinates and the harmonic frequencies are given in Tables S19 and S20, respectively.

| m/z                                                                                                                           | 73                                     | 15                                       |
|-------------------------------------------------------------------------------------------------------------------------------|----------------------------------------|------------------------------------------|
|                                                                                                                               | $\text{CH}_3 + \text{COCO}^+\text{OH}$ | $\text{CH}_3^+ + \text{COCO}^+\text{OH}$ |
| AE (PBE0/aug-cc-pVDZ (opt) // (R)CCSD(T)-F12 /cc-pVTZ-F12)                                                                    | 12.108                                 | 14.973                                   |
| $\Delta\text{CV}$                                                                                                             | -0.02058                               | -0.01961                                 |
| $\Delta\text{SR}$                                                                                                             | 0.000394                               | 0.000718                                 |
| $\Delta\text{ZPVE}$                                                                                                           | -0.27502633                            | -0.25332354                              |
| AE (PBE0/aug-cc-pVDZ (opt) // (R)CCSD(T)-F12 /cc-pVTZ-F12 + $\Delta\text{CV}$ + $\Delta\text{SR}$ + $\Delta\text{ZPVE}$ (SP)) | 11.813                                 | 14.701                                   |



**Table S10:** Total energies (in Hartree) of the  $(\text{OH} + \text{CH}_3\text{-CO-CO})^+$  fragmentation pathways of the resulting cation of Pyruvic acid. ZPE (in kJ/mol) is evaluated at the PBE0/aug-cc-pVDZ level using the corresponding anharmonic frequencies. PBE0 computations correspond to optimization and the other computations are single point computations. The corresponding Cartesian coordinates and the harmonic frequencies are given in Tables S19 and S20, respectively.

|                                 | OH                                                                                 | OH <sup>+</sup>                                                                     | CH <sub>3</sub> -CO-CO                                                              | CH <sub>3</sub> -CO-CO <sup>+</sup>                                                 |
|---------------------------------|------------------------------------------------------------------------------------|-------------------------------------------------------------------------------------|-------------------------------------------------------------------------------------|-------------------------------------------------------------------------------------|
|                                 |  |  |  |  |
| PBE0/aug-cc-pVDZ                | -75.6673072792                                                                     | -75.1891550277                                                                      | -266.246018965                                                                      | -265.975308104                                                                      |
| ZPVE/ PBE0/aug-cc-pVDZ (kJ/mol) | 21.47                                                                              | 17.40                                                                               | 137.15                                                                              | 132.03                                                                              |
| (R)CCSD(T)-F12/cc-pVTZ-F12      | -75.67033505                                                                       | -75.19212473                                                                        | -266.19661144                                                                       | -265.95209795                                                                       |
| (R)CCSD(T,fc)/cc-pwCVTZ         | -75.69523600                                                                       | -75.22593813                                                                        | -266.35617899                                                                       | -266.11899158                                                                       |
| (R)CCSD(T,full)/cc-pwCVTZ       | -75.64248265                                                                       | -75.17358117                                                                        | -266.10515783                                                                       | -265.86867635                                                                       |
| (R)CCSD(T)/cc-pVTZ              | -75.63765847                                                                       | -75.16906305                                                                        | -266.08766511                                                                       | -265.85035505                                                                       |
| (R)CCSD(T)cc-pVTZ-DK            | -75.63304823                                                                       | -75.16451897                                                                        | -266.07626114                                                                       | -265.83890404                                                                       |

**Table S11:** Calculated and measured appearance energies (AEs in eV) of the  $(\text{OH} + \text{CH}_3\text{-CO-CO})^+$  fragmentation pathways of the resulting cation of Pyruvic acid.  $\Delta\text{ZPE}$  (in eV) is evaluated at the PBE0/aug-cc-pVDZ level using the corresponding anharmonic frequencies.  $\Delta\text{CV}$  and  $\Delta\text{SR}$  are for core valence and scalar relativistic effects. The corresponding Cartesian coordinates and the harmonic frequencies are given in Tables S19 and S20, respectively.

| m/z                                                                                                                           | 71                                       | 17                                       |
|-------------------------------------------------------------------------------------------------------------------------------|------------------------------------------|------------------------------------------|
|                                                                                                                               | $\text{CH}_3\text{-CO-CO}^+ + \text{OH}$ | $\text{CH}_3\text{-CO-CO} + \text{OH}^+$ |
| AE (PBE0/aug-cc-pVDZ (opt) // (R)CCSD(T)-F12 /cc-pVTZ-F12)                                                                    | 11.607                                   | 17.966                                   |
| $\Delta\text{CV}$                                                                                                             | -0.02792                                 | -0.01949                                 |
| $\Delta\text{SR}$                                                                                                             | 0.005431                                 | 0.00235                                  |
| $\Delta\text{ZPVE}$                                                                                                           | -0.33516                                 | -0.32428                                 |
| AE (PBE0/aug-cc-pVDZ (opt) // (R)CCSD(T)-F12 /cc-pVTZ-F12 + $\Delta\text{CV}$ + $\Delta\text{SR}$ + $\Delta\text{ZPVE}$ (SP)) | 11.249                                   | 17.625                                   |

**Table S12:** Total energies (in Hartree) of the  $(\text{CO}_2 + \text{X})^+$  fragmentation pathways of the resulting cation of Pyruvic acid. ZPE (in kJ/mol) is evaluated at the PBE0/aug-cc-pVDZ level using the corresponding anharmonic frequencies. PBE0 computations correspond to optimization and the other computations are single point computations. The corresponding Cartesian coordinates and the harmonic frequencies are given in Tables S19 and S20, respectively.

|                                 | $\text{CO}_2$                                                                       | $\text{CO}_2^+$                                                                      | $\text{CH}_2\text{-CH-OH}$                                                            | $\text{CH}_2\text{-CH-OH}^+$                                                          | $\text{CH}_2\text{-OCH}_2$                                                            | $\text{CH}_2\text{-OCH}_2^+$                                                          |
|---------------------------------|-------------------------------------------------------------------------------------|--------------------------------------------------------------------------------------|---------------------------------------------------------------------------------------|---------------------------------------------------------------------------------------|---------------------------------------------------------------------------------------|---------------------------------------------------------------------------------------|
|                                 |    |    |    |    |    |    |
| PBE0/aug-cc-pVDZ                | -188.414157458                                                                      | -187.909219161                                                                       | -153.657329474                                                                        | -153.325148015                                                                        | -153.634153504                                                                        | -153.252816012                                                                        |
| ZPVE/ PBE0/aug-cc-pVDZ (kJ/mol) | 30.86                                                                               | 24.51                                                                                | 147.09                                                                                | 146.23                                                                                | 149.34                                                                                | 140.56                                                                                |
| (R)CCSD(T)-F12/cc-pVTZ-F12      | -188.40586081                                                                       | -187.89564368                                                                        | -153.63453086                                                                         | -153.29211150                                                                         | -153.60780562                                                                         | -153.21572392                                                                         |
| (R)CCSD(T,fc)/cc-pwCVTZ         | -188.49484433                                                                       | -187.99187430                                                                        | -153.72966261                                                                         | -153.39211567                                                                         | -153.70239134                                                                         | -153.31693194                                                                         |
| (R)CCSD(T,full)/cc-pwCVTZ       | -188.34054828                                                                       | -187.83821391                                                                        | -153.57970301                                                                         | -153.24272138                                                                         | -153.55272689                                                                         | -153.16773485                                                                         |
| (R)CCSD(T)/cc-pVTZ              | -188.32719079                                                                       | -187.82532512                                                                        | -153.57044196                                                                         | -153.23352843                                                                         | -153.54346032                                                                         | -153.15873467                                                                         |
| (R)CCSD(T)cc-pVTZ-DK            | -188.31738266                                                                       | -187.81554969                                                                        | -153.56413281                                                                         | -153.22745570                                                                         | -153.53733301                                                                         | -153.15261041                                                                         |
|                                 | $\text{CH}_3\text{-CH-O}$                                                           | $\text{CH}_3\text{-CH-O}^+$                                                          | $\text{CH}_3\text{-C-O-H}$                                                            | $\text{CH}_3\text{-C-O-H}^+$                                                          | $\text{CH-CH}_2\text{-OH}$                                                            | $\text{CH-CH}_2\text{-OH}^+$                                                          |
|                                 |  |  |  |  |  |  |
| PBE0/aug-cc-pVDZ                | -153.672427821                                                                      | -153.304140477                                                                       | -153.586719850                                                                        | -153.294615393                                                                        | -153.523765978                                                                        | -153.247881834                                                                        |
| ZPVE/ PBE0/aug-cc-pVDZ (kJ/mol) | 143.46                                                                              | 137.15                                                                               | 139.70                                                                                | 139.60                                                                                | 143.13                                                                                | 144.45                                                                                |

|                            |               |               |               |               |               |               |
|----------------------------|---------------|---------------|---------------|---------------|---------------|---------------|
| (R)CCSD(T)-F12/cc-pVTZ-F12 | -153.64953585 | -153.26990680 | -153.56321018 | -153.26089944 | -153.50022622 | -153.21563131 |
| (R)CCSD(T,fc)/cc-pwCVTZ    | -153.74544265 | -153.37135943 | -153.65864490 | -153.36100916 | -153.59492362 | -153.31535212 |
| (R)CCSD(T,full)/cc-pwCVTZ  | -153.59568130 | -153.22194056 | -153.50943806 | -153.21152149 | -153.44610643 | -153.16621022 |
| (R)CCSD(T)/cc-pVTZ         | -153.58610501 | -153.21262205 | -153.50001688 | -153.20220369 | -153.43695504 | -153.15724598 |
| (R)CCSD(T)cc-pVTZ-DK       | -153.57999295 | -153.20651803 | -153.49389388 | -153.19612142 | -153.43084580 | -153.15116518 |

**Table S13:** Calculated and measured appearance energies (AEs in eV) of the  $(\text{CO}_2 + \text{X})^+$  fragmentation pathways of the resulting cation of Pyruvic acid.  $\Delta\text{ZPE}$  (in eV) is evaluated at the PBE0/aug-cc-pVDZ level using the corresponding anharmonic frequencies.  $\Delta\text{CV}$  and  $\Delta\text{SR}$  are for core valence and scalar relativistic effects. The corresponding Cartesian coordinates and the harmonic frequencies are given in Tables S19 and S20, respectively.

| m/z                                                                                                                           | 44                                                    |                                                      |                                                       |                                                       |                                                                  | 44                                                   |                                                       |                                                                  |                                                       |                                                       |
|-------------------------------------------------------------------------------------------------------------------------------|-------------------------------------------------------|------------------------------------------------------|-------------------------------------------------------|-------------------------------------------------------|------------------------------------------------------------------|------------------------------------------------------|-------------------------------------------------------|------------------------------------------------------------------|-------------------------------------------------------|-------------------------------------------------------|
|                                                                                                                               | CH <sub>2</sub> -CH-OH <sup>+</sup> + CO <sub>2</sub> | CH <sub>3</sub> -CH-O <sup>+</sup> + CO <sub>2</sub> | CH <sub>3</sub> -C-O-H <sup>+</sup> + CO <sub>2</sub> | CH-CH <sub>2</sub> -OH <sup>+</sup> + CO <sub>2</sub> | CH <sub>2</sub> -OCH <sub>2</sub> <sup>+</sup> + CO <sub>2</sub> | CH <sub>3</sub> -CH-O + CO <sub>2</sub> <sup>+</sup> | CH <sub>2</sub> -CH-OH + CO <sub>2</sub> <sup>+</sup> | CH <sub>2</sub> -OCH <sub>2</sub> + CO <sub>2</sub> <sup>+</sup> | CH <sub>3</sub> -C-O-H + CO <sub>2</sub> <sup>+</sup> | CH-CH <sub>2</sub> -OH + CO <sub>2</sub> <sup>+</sup> |
| AE (PBE0/aug-cc-pVDZ (opt) // (R)CCSD(T)-F12 /cc-pVTZ-F12)                                                                    | 9.551                                                 | 10.156                                               | 10.401                                                | 11.633                                                | 11.630                                                           | 13.709                                               | 14.118                                                | 14.845                                                           | 16.058                                                | 17.772                                                |
| $\Delta\text{CV}$                                                                                                             | -0.011                                                | -0.01033                                             | -0.00846                                              | -0.01787                                              | -0.01636                                                         | -0.01831                                             | -0.01291                                              | -0.02094                                                         | -0.0334                                               | -0.044                                                |
| $\Delta\text{SR}$                                                                                                             | 0.000522                                              | 0.001373                                             | 0.000782                                              | 0.000742                                              | 0.001924                                                         | 0.000702                                             | 0.006065                                              | 0.001117                                                         | 0.001                                                 | 0.000626                                              |
| $\Delta\text{ZPVE}$                                                                                                           | -0.0906874                                            | -0.184795                                            | -0.1594025                                            | -0.1091358                                            | -0.1494528                                                       | -0.1852095                                           | -0.1475872                                            | -0.1242676                                                       | -0.2241792                                            | -0.18863                                              |
| AE (PBE0/aug-cc-pVDZ (opt) // (R)CCSD(T)-F12 /cc-pVTZ-F12 + $\Delta\text{CV}$ + $\Delta\text{SR}$ + $\Delta\text{ZPVE}$ (SP)) | 9.450                                                 | 9.962                                                | 10.234                                                | 11.506                                                | 11.466                                                           | 13.506                                               | 13.963                                                | 14.701                                                           | 15.802                                                | 17.540                                                |

**Table S14:** Total energies (in Hartree) of the (O + X)<sup>+</sup> fragmentation pathways of the resulting cation of Pyruvic acid. ZPE (in kJ/mol) is evaluated at the PBE0/aug-cc-pVDZ level using the corresponding anharmonic frequencies. PBE0 computations correspond to optimization and the other computations are single point computations. The corresponding Cartesian coordinates and the harmonic frequencies are given in Tables S19 and S20, respectively.

|                                 | O                                                                                    | O <sup>+</sup>                                                                        | CH <sub>3</sub> -C-CO <sub>2</sub> H                                                  | CH <sub>3</sub> -C-CO <sub>2</sub> H <sup>+</sup>                                     |
|---------------------------------|--------------------------------------------------------------------------------------|---------------------------------------------------------------------------------------|---------------------------------------------------------------------------------------|---------------------------------------------------------------------------------------|
|                                 |     |    |    |    |
| PBE0/aug-cc-pVDZ                | -75.0002110695                                                                       | -74.4911691344                                                                        | -266.796422782                                                                        | -266.507836191                                                                        |
| ZPVE/ PBE0/aug-cc-pVDZ (kJ/mol) | 0                                                                                    | 0                                                                                     | 164.30                                                                                | 167.96                                                                                |
| (R)CCSD(T)-F12/cc-pVTZ-F12      | -75.00069988                                                                         | -74.50232615                                                                          | -266.75291927                                                                         | -266.45328204                                                                         |
| (R)CCSD(T,fc)/cc-pwCVTZ         | -75.03119932                                                                         | -74.54085749                                                                          | -266.90921306                                                                         | -266.61635367                                                                         |
| (R)CCSD(T,full)/cc-pwCVTZ       | -74.97865207                                                                         | -74.48877120                                                                          | -266.65861371                                                                         | -266.36544495                                                                         |
| (R)CCSD(T)/cc-pVTZ              | -74.97382933                                                                         | -74.48437583                                                                          | -266.64152965                                                                         | -266.34850672                                                                         |
| (R)CCSD(T)cc-pVTZ-DK            | -74.96911772                                                                         | -74.47975951                                                                          | -266.63010453                                                                         | -266.33712177                                                                         |
|                                 | CH <sub>3</sub> -CO-CHO                                                              | CH <sub>3</sub> -CO-CHO <sup>+</sup>                                                  | CH <sub>3</sub> -CO-COH                                                               | CH <sub>3</sub> -CO-COH <sup>+</sup>                                                  |
|                                 |  |  |  |  |
| PBE0/aug-cc-pVDZ                | -266.887311061                                                                       | -266.538886226                                                                        | -266.808614389                                                                        | -266.498889227                                                                        |

|                                 |               |               |               |               |
|---------------------------------|---------------|---------------|---------------|---------------|
| ZPVE/ PBE0/aug-cc-pVDZ (kJ/mol) | 168.79        | 162.11        | 167.65        | 164.12        |
| (R)CCSD(T)-F12/cc-pVTZ-F12      | -266.85019955 | -266.49336390 | -266.77078825 | -266.45150303 |
| (R)CCSD(T,fc)/cc-pwCVTZ         | -267.00855861 | -266.65760146 | -266.92901488 | -266.61442512 |
| (R)CCSD(T,full)/cc-pwCVTZ       | -266.75755826 | -266.40704750 | -266.67861817 | -266.36413980 |
| (R)CCSD(T)/cc-pVTZ              | -266.74045013 | -266.38982830 | -266.66165740 | -266.34714014 |
| (R)CCSD(T)cc-pVTZ-DK            | -266.72905291 | -266.37842741 | -266.65024884 | -266.33575280 |

**Table S15:** Calculated and measured appearance energies (AEs in eV) of the (O + X)<sup>+</sup> fragmentation pathways of the resulting cation of Pyruvic acid.  $\Delta ZPE$  (in eV) is evaluated at the PBE0/aug-cc-pVDZ level using the corresponding anharmonic frequencies.  $\Delta CV$  and  $\Delta SR$  are for core valence and scalar relativistic effects. The corresponding Cartesian coordinates and the harmonic frequencies are given in Tables S19 and S20, respectively.

| m/z                                                                                                         | 72                                       |                                                       |                                          | 16                                       |                                          |                                                       |
|-------------------------------------------------------------------------------------------------------------|------------------------------------------|-------------------------------------------------------|------------------------------------------|------------------------------------------|------------------------------------------|-------------------------------------------------------|
|                                                                                                             | CH <sub>3</sub> -CO-CHO <sup>+</sup> + O | CH <sub>3</sub> -C-CO <sub>2</sub> H <sup>+</sup> + O | CH <sub>3</sub> -CO-COH <sup>+</sup> + O | CH <sub>3</sub> -CO-CHO + O <sup>+</sup> | CH <sub>3</sub> -CO-COH + O <sup>+</sup> | CH <sub>3</sub> -C-CO <sub>2</sub> H + O <sup>+</sup> |
| AE (PBE0/aug-cc-pVDZ (opt) // (R)CCSD(T)-F12 /cc-pVTZ-F12)                                                  | 15.100                                   | 16.191                                                | 16.239                                   | 18.952                                   | 21.112                                   | 21.599                                                |
| $\Delta CV$                                                                                                 | -0.02703                                 | -0.01738                                              | -0.03434                                 | -0.02743                                 | -0.04385                                 | -0.03834                                              |
| $\Delta SR$                                                                                                 | 0.006825                                 | 0.006391                                              | 0.006456                                 | 0.004132                                 | 0.004441                                 | 0.004892                                              |
| $\Delta ZPVE$                                                                                               | -0.2459442                               | -0.1853132                                            | -0.225112                                | -0.1767108                               | -0.1885261                               | -0.2232464                                            |
| AE (PBE0/aug-cc-pVDZ (opt) // (R)CCSD(T)-F12 /cc-pVTZ-F12 + $\Delta CV$ + $\Delta SR$ + $\Delta ZPVE$ (SP)) | 14.834                                   | 15.995                                                | 15.986                                   | 18.752                                   | 20.885                                   | 21.342                                                |



**Table S16:** Total energies (in Hartree) of the  $(\text{H}_2\text{C}_2\text{O} + \text{H}_2\text{CO}_2)^+$  and  $(\text{H}_2\text{C}_2\text{O} + \text{CO}_2 + \text{H}_2)^+$  fragmentation pathways of the resulting cation of Pyruvic acid. ZPE (in kJ/mol) is evaluated at the PBE0/aug-cc-pVDZ level using the corresponding anharmonic frequencies. PBE0 computations correspond to optimization and the other computations are single point computations. The corresponding Cartesian coordinates and the harmonic frequencies are given in Tables S19 and S20, respectively.

|                                 | $\text{H}_2$                                                                      | $\text{H}_2^+$                                                                     | $\text{H}_2\text{C}_2\text{O}$                                                      | $\text{H}_2\text{C}_2\text{O}^+$                                                    | $\text{H}_2\text{CO}_2$                                                             | $\text{H}_2\text{CO}_2^+$                                                           |
|---------------------------------|-----------------------------------------------------------------------------------|------------------------------------------------------------------------------------|-------------------------------------------------------------------------------------|-------------------------------------------------------------------------------------|-------------------------------------------------------------------------------------|-------------------------------------------------------------------------------------|
|                                 | 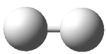 |  |  |  |  |  |
| PBE0/aug-cc-pVDZ                | -1.16388851188                                                                    | -0.608136156337                                                                    | -152.446776790                                                                      | -152.096384536                                                                      | -189.590222020                                                                      | -189.182538255                                                                      |
| ZPVE/ PBE0/aug-cc-pVDZ (kJ/mol) | 24.836                                                                            | 11.571                                                                             | 82.141                                                                              | 81.232                                                                              | 88.093                                                                              | 83.710                                                                              |
| (R)CCSD(T)-F12/cc-pVTZ-F12      | -1.17380645                                                                       | -0.60203438                                                                        | -152.41949304                                                                       | -152.06697548                                                                       | -189.58350208                                                                       | -189.16609480                                                                       |
| (R)CCSD(T,fc)/cc-pwCVTZ         | -1.17212023                                                                       | -0.60171636                                                                        | -152.51832795                                                                       | -152.17065574                                                                       | -189.66854677                                                                       | -189.25866463                                                                       |
| (R)CCSD(T,full)/cc-pwCVTZ       | -1.17212023                                                                       | -0.60171636                                                                        | -152.36838624                                                                       | -152.02127530                                                                       | -189.51434060                                                                       | -189.10480058                                                                       |
| (R)CCSD(T)/cc-pVTZ              | -1.17212023                                                                       | -0.60171636                                                                        | -152.35825095                                                                       | -152.01129805                                                                       | -189.50182263                                                                       | -189.09259871                                                                       |
| (R)CCSD(T)cc-pVTZ-DK            | -1.17212099                                                                       | -0.60171626                                                                        | -152.35215229                                                                       | -152.00520404                                                                       | -189.49201998                                                                       | -189.08282581                                                                       |

**Table S17:** Calculated and measured appearance energies of the  $(\text{H}_2\text{C}_2\text{O} + \text{H}_2\text{CO}_2)^+$  and  $(\text{H}_2\text{C}_2\text{O} + \text{CO}_2 + \text{H}_2)^+$  fragmentation pathways of the resulting cation of Pyruvic acid.  $\Delta\text{ZPE}$  (in eV) is evaluated at the PBE0/aug-cc-pVDZ level using the corresponding anharmonic frequencies.  $\Delta\text{CV}$  and  $\Delta\text{SR}$  are for core valence and scalar relativistic effects. The corresponding Cartesian coordinates and the harmonic frequencies are given in Tables S19 and S20, respectively.

| m/z                                                                                                                           | 42                                                       |                                                             | 46                                                       | 44                                                          | 2                                                           |
|-------------------------------------------------------------------------------------------------------------------------------|----------------------------------------------------------|-------------------------------------------------------------|----------------------------------------------------------|-------------------------------------------------------------|-------------------------------------------------------------|
|                                                                                                                               | $\text{H}_2\text{C}_2\text{O}^+ + \text{H}_2\text{CO}_2$ | $\text{H}_2\text{C}_2\text{O}^+ + \text{CO}_2 + \text{H}_2$ | $\text{H}_2\text{C}_2\text{O} + \text{H}_2\text{CO}_2^+$ | $\text{H}_2\text{C}_2\text{O} + \text{CO}_2^+ + \text{H}_2$ | $\text{H}_2\text{C}_2\text{O} + \text{CO}_2 + \text{H}_2^+$ |
| AE (PBE0/aug-cc-pVDZ (opt) // (R)CCSD(T)-F12 /cc-pVTZ-F12)                                                                    | 10.844                                                   | 10.948                                                      | 12.610                                                   | 15.239                                                      | 16.914                                                      |
| $\Delta\text{CV}$                                                                                                             | -0.01382                                                 | -0.011375454                                                | -0.00786                                                 | -0.01339971                                                 | 0.003897                                                    |
| $\Delta\text{SR}$                                                                                                             | 0.000952                                                 | 0.001080293                                                 | 0.000269                                                 | 0.000317013                                                 | 0.00123                                                     |
| $\Delta\text{ZPVE}$                                                                                                           | -0.17116596                                              | -0.50693729                                                 | -0.20717144                                              | -0.56332929                                                 | -0.63499824                                                 |
| AE (PBE0/aug-cc-pVDZ (opt) // (R)CCSD(T)-F12/ cc-pVTZ-F12 + $\Delta\text{CV}$ + $\Delta\text{SR}$ + $\Delta\text{ZPVE}$ (SP)) | 10.660                                                   | 10.431                                                      | 12.395                                                   | 14.663                                                      | 16.285                                                      |

**Table S18:** Harmonic frequencies ( $\omega_i$ ,  $\text{cm}^{-1}$ ) of pyruvic acid and its ions as computed at the PBE0/aug-cc-pVDZ level of theory.

| Species       | Tc        | Tc <sup>+</sup> | Tt                          | Tt <sup>+</sup> | Ct                          |
|---------------|-----------|-----------------|-----------------------------|-----------------|-----------------------------|
| $\omega_1$    | 3633.630  | 3667.388        | 3790.605                    | 3682.547        | 3781.720                    |
| $\omega_2$    | 3202.461  | 3197.582        | 3201.152                    | 3209.910        | 3195.701                    |
| $\omega_3$    | 3066.777  | 3049.810        | 3142.526                    | 3132.050        | 3140.533                    |
| $\omega_4$    | 1871.802  | 1977.364        | 3066.876                    | 3047.504        | 3063.504                    |
| $\omega_5$    | 1810.092  | 1903.255        | 1839.738                    | 1921.024        | 1866.967                    |
| $\omega_6$    | 1431.359  | 1401.974        | 1828.853                    | 1866.336        | 1845.480                    |
| $\omega_7$    | 1420.811  | 1327.888        | 1429.602                    | 1406.827        | 1434.562                    |
| $\omega_8$    | 1367.310  | 1281.127        | 1425.343                    | 1391.867        | 1429.093                    |
| $\omega_9$    | 1261.380  | 1210.429        | 1418.757                    | 1323.646        | 1374.391                    |
| $\omega_{10}$ | 1174.468  | 1028.689        | 1361.614                    | 1317.563        | 1354.929                    |
| $\omega_{11}$ | 978.888   | 945.326         | 1237.055                    | 1184.477        | 1204.462                    |
| $\omega_{12}$ | 784.317   | 592.532         | 1158.523                    | 1021.005        | 1158.435                    |
| $\omega_{13}$ | 612.152   | 494.660         | 1024.244                    | 1001.748        | 1026.702                    |
| $\omega_{14}$ | 530.300   | 372.099         | 972.614                     | 948.433         | 977.462                     |
| $\omega_{15}$ | 392.372   | 295.092         | 756.895                     | 697.620         | 747.830                     |
| $\omega_{16}$ | 250.264   | 227.426         | 734.972                     | 599.687         | 736.980                     |
| $\omega_{17}$ | 3141.106  | 3136.144        | 634.695                     | 595.187         | 628.598                     |
| $\omega_{18}$ | 1426.077  | 1390.887        | 595.202                     | 492.822         | 614.160                     |
| $\omega_{19}$ | 1022.984  | 1007.509        | 518.900                     | 451.819         | 485.054                     |
| $\omega_{20}$ | 759.801   | 672.146         | 388.318                     | 344.557         | 399.797                     |
| $\omega_{21}$ | 714.311   | 565.575         | 384.061                     | 332.740         | 387.797                     |
| $\omega_{22}$ | 398.426   | 389.591         | 245.248                     | 232.341         | 252.705                     |
| $\omega_{23}$ | 126.252   | 127.989         | 130.495                     | 123.200         | 157.695                     |
| $\omega_{24}$ | 94.579    | 57.522          | 37.997                      | 15.000          | 22.659                      |
|               | <b>Cc</b> | <b>enolPACc</b> | <b>enolPACc<sup>+</sup></b> | <b>enolPATc</b> | <b>enolPATc<sup>+</sup></b> |
| $\omega_1$    | 3842.626  | 3802.668        | 3729.470                    | 3836.296        | 3745.984                    |
| $\omega_2$    | 3187.798  | 3715.621        | 3348.481                    | 3810.869        | 3603.442                    |
| $\omega_3$    | 3114.420  | 3318.702        | 3309.481                    | 3319.828        | 3311.229                    |
| $\omega_4$    | 3037.630  | 3203.956        | 3174.033                    | 3204.038        | 3174.503                    |
| $\omega_5$    | 1888.766  | 1798.288        | 1859.838                    | 1845.238        | 1863.844                    |

|               |                 |                 |                             |          |          |
|---------------|-----------------|-----------------|-----------------------------|----------|----------|
| $\omega_6$    | 1850.048        | 1751.195        | 1615.288                    | 1745.344 | 1610.636 |
| $\omega_7$    | 1450.071        | 1476.553        | 1525.989                    | 1414.493 | 1510.564 |
| $\omega_8$    | 1439.578        | 1412.744        | 1445.526                    | 1404.132 | 1412.676 |
| $\omega_9$    | 1359.717        | 1358.249        | 1379.946                    | 1343.979 | 1357.171 |
| $\omega_{10}$ | 1325.075        | 1245.001        | 1211.139                    | 1211.955 | 1178.976 |
| $\omega_{11}$ | 1198.727        | 1195.099        | 1187.865                    | 1152.900 | 1175.460 |
| $\omega_{12}$ | 1136.943        | 985.815         | 1012.337                    | 976.558  | 1006.196 |
| $\omega_{13}$ | 1017.602        | 903.963         | 965.404                     | 912.956  | 973.892  |
| $\omega_{14}$ | 965.861         | 824.777         | 916.737                     | 810.839  | 813.447  |
| $\omega_{15}$ | 759.558         | 808.031         | 785.132                     | 794.129  | 781.453  |
| $\omega_{16}$ | 711.397         | 738.199         | 773.587                     | 738.513  | 723.374  |
| $\omega_{17}$ | 615.807         | 615.092         | 651.675                     | 613.376  | 617.486  |
| $\omega_{18}$ | 503.687         | 599.753         | 606.842                     | 578.043  | 575.518  |
| $\omega_{19}$ | 480.504         | 568.121         | 508.739                     | 540.936  | 532.031  |
| $\omega_{20}$ | 403.413         | 515.301         | 439.738                     | 411.008  | 463.841  |
| $\omega_{21}$ | 376.252         | 402.005         | 379.864                     | 402.079  | 379.095  |
| $\omega_{22}$ | 258.495         | 397.133         | 340.584                     | 398.581  | 356.686  |
| $\omega_{23}$ | 187.144         | 275.264         | 235.391                     | 277.882  | 238.194  |
| $\omega_{24}$ | 4.252           | 109.209         | 116.817                     | 90.661   | 75.647   |
|               | <b>enolPATt</b> | <b>enolPACt</b> | <b>enolPACt<sup>+</sup></b> |          |          |
| $\omega_1$    | 3859.754        | 3867.354        | 3746.336                    |          |          |
| $\omega_2$    | 3800.348        | 3809.430        | 3698.273                    |          |          |
| $\omega_3$    | 3304.871        | 3307.515        | 3299.076                    |          |          |
| $\omega_4$    | 3187.878        | 3185.062        | 3163.324                    |          |          |
| $\omega_5$    | 1828.241        | 1843.410        | 1885.031                    |          |          |
| $\omega_6$    | 1728.118        | 1720.379        | 1582.123                    |          |          |
| $\omega_7$    | 1463.870        | 1459.195        | 1496.314                    |          |          |
| $\omega_8$    | 1407.140        | 1417.279        | 1438.485                    |          |          |
| $\omega_9$    | 1328.016        | 1341.946        | 1344.695                    |          |          |
| $\omega_{10}$ | 1198.212        | 1219.673        | 1195.504                    |          |          |
| $\omega_{11}$ | 1174.544        | 1148.927        | 1153.259                    |          |          |
| $\omega_{12}$ | 972.265         | 982.831         | 1000.326                    |          |          |
| $\omega_{13}$ | 894.508         | 888.491         | 950.981                     |          |          |

|               |         |         |         |  |  |
|---------------|---------|---------|---------|--|--|
| $\omega_{14}$ | 815.332 | 820.682 | 797.343 |  |  |
| $\omega_{15}$ | 802.889 | 800.004 | 774.411 |  |  |
| $\omega_{16}$ | 727.571 | 724.297 | 689.222 |  |  |
| $\omega_{17}$ | 651.658 | 600.488 | 640.845 |  |  |
| $\omega_{18}$ | 580.371 | 600.090 | 591.119 |  |  |
| $\omega_{19}$ | 527.607 | 509.091 | 503.996 |  |  |
| $\omega_{20}$ | 432.918 | 430.825 | 410.415 |  |  |
| $\omega_{21}$ | 404.839 | 414.747 | 398.493 |  |  |
| $\omega_{22}$ | 384.753 | 391.244 | 268.263 |  |  |
| $\omega_{23}$ | 272.691 | 278.170 | 260.605 |  |  |
| $\omega_{24}$ | 67.699  | 63.927  | 43.355  |  |  |

**Table S19:** Harmonic frequencies (in  $\text{cm}^{-1}$ ) of all fragments, in their electronic ground state, treated in this study as computed at the PBE0/aug-cc-pVDZ level of theory. See Figure ??FRAGMENTS for the denomination of the molecular species.

| Species       | OH                             | OH <sup>+</sup>                             | H <sub>2</sub>      | H <sub>2</sub> <sup>+</sup>      | CO <sub>2</sub>    | CO <sub>2</sub> <sup>+</sup>    | CH <sub>3</sub>     | CH <sub>3</sub> <sup>+</sup>                 | HOCO                 | HOCO <sup>+</sup>                 | H <sub>2</sub> C <sub>2</sub> O | H <sub>2</sub> C <sub>2</sub> O <sup>+</sup> |
|---------------|--------------------------------|---------------------------------------------|---------------------|----------------------------------|--------------------|---------------------------------|---------------------|----------------------------------------------|----------------------|-----------------------------------|---------------------------------|----------------------------------------------|
| $\omega_1$    | 3744.700                       | 3081.923                                    | 4369.570            | 2090.547                         | 1379.954           | 1317.058                        | 3122.767            | 3243.802                                     | 3837.598             | 3546.571                          | 3321.490                        | 3256.767                                     |
| $\omega_2$    |                                |                                             |                     |                                  | 2438.578           | 1421.399                        | 542.183             | 3243.801                                     | 1928.759             | 2498.180                          | 3211.821                        | 3121.421                                     |
| $\omega_3$    |                                |                                             |                     |                                  | 679.992            | 477.132                         | 3320.658            | 1423.198                                     | 1257.646             | 1277.831                          | 2246.129                        | 2308.411                                     |
| $\omega_4$    |                                |                                             |                     |                                  | 679.992            | 477.132                         | 3320.658            | 1385.714                                     | 1117.672             | 1053.895                          | 1395.528                        | 1359.150                                     |
| $\omega_5$    |                                |                                             |                     |                                  |                    |                                 | 1378.610            | 1385.713                                     | 620.644              | 602.187                           | 1175.587                        | 1066.536                                     |
| $\omega_6$    |                                |                                             |                     |                                  |                    |                                 | 1378.610            | 3029.885                                     | 554.038              | 549.907                           | 971.085                         | 1000.104                                     |
| $\omega_7$    |                                |                                             |                     |                                  |                    |                                 |                     |                                              |                      |                                   | 437.776                         | 408.407                                      |
| $\omega_8$    |                                |                                             |                     |                                  |                    |                                 |                     |                                              |                      |                                   | 595.004                         | 757.356                                      |
| $\omega_9$    |                                |                                             |                     |                                  |                    |                                 |                     |                                              |                      |                                   | 544.733                         | 461.424                                      |
|               | H <sub>2</sub> CO <sub>2</sub> | H <sub>2</sub> CO <sub>2</sub> <sup>+</sup> | COCO <sub>2</sub> H | COCO <sub>2</sub> H <sup>+</sup> | CH <sub>3</sub> CO | CH <sub>3</sub> CO <sup>+</sup> | CH <sub>2</sub> COH | C <sub>2</sub> H <sub>3</sub> O <sup>+</sup> | CH <sub>2</sub> C-OH | CH <sub>2</sub> C-OH <sup>+</sup> | CH <sub>2</sub> -CH-OH          | CH <sub>2</sub> -CH-OH <sup>+</sup>          |
| $\omega_1$    | 3767.075                       | 3631.707                                    | 3750.335            | 3667.893                         | 3158.379           | 3123.776                        | 3293.790            | 3202.453                                     | 3842.232             | 3548.574                          | 3842.319                        | 3675.624                                     |
| $\omega_2$    | 3082.823                       | 3027.368                                    | 1944.974            | 2373.416                         | 3152.658           | 3122.796                        | 3166.316            | 3146.061                                     | 3269.501             | 3218.148                          | 3285.555                        | 3292.252                                     |
| $\omega_3$    | 1841.989                       | 1588.217                                    | 1892.899            | 1988.850                         | 3041.907           | 3018.045                        | 2981.420            | 1697.092                                     | 3132.764             | 3119.092                          | 3222.207                        | 3213.952                                     |
| $\omega_4$    | 1390.463                       | 1383.498                                    | 1330.747            | 1304.408                         | 1949.421           | 2396.044                        | 1578.189            | 1438.455                                     | 1749.006             | 2154.979                          | 3173.191                        | 3161.019                                     |
| $\omega_5$    | 1312.139                       | 1220.959                                    | 1170.990            | 1178.612                         | 1419.610           | 1362.462                        | 1461.836            | 1355.477                                     | 1390.098             | 1329.583                          | 1723.025                        | 1608.688                                     |
| $\omega_6$    | 1152.920                       | 1173.806                                    | 778.533             | 723.628                          | 1416.702           | 1362.349                        | 1383.305            | 1129.391                                     | 1239.707             | 1208.476                          | 1431.058                        | 1469.324                                     |
| $\omega_7$    | 1058.118                       | 1008.762                                    | 657.426             | 668.294                          | 1323.504           | 1330.645                        | 1171.553            | 1013.792                                     | 1133.533             | 1128.942                          | 1354.131                        | 1413.078                                     |
| $\omega_8$    | 690.301                        | 713.300                                     | 646.341             | 600.717                          | 1043.732           | 1000.247                        | 977.474             | 578.748                                      | 955.174              | 880.387                           | 1318.267                        | 1296.983                                     |
| $\omega_9$    | 629.483                        | 481.080                                     | 549.735             | 558.613                          | 933.359            | 999.864                         | 974.612             | 3286.522                                     | 825.615              | 837.252                           | 1134.149                        | 1157.673                                     |
| $\omega_{10}$ |                                |                                             | 488.896             | 415.837                          | 892.789            | 940.483                         | 767.184             | 1081.522                                     | 620.810              | 813.477                           | 995.870                         | 1048.214                                     |
| $\omega_{11}$ |                                |                                             | 265.085             | 260.278                          | 465.497            | 415.867                         | 499.567             | 1017.391                                     | 441.972              | 380.382                           | 957.407                         | 980.378                                      |

|               |                                       |                                                    |                           |                                        |                            |                                         |                            |                                         |                            |                                         |                                           |                                                        |
|---------------|---------------------------------------|----------------------------------------------------|---------------------------|----------------------------------------|----------------------------|-----------------------------------------|----------------------------|-----------------------------------------|----------------------------|-----------------------------------------|-------------------------------------------|--------------------------------------------------------|
| $\omega_{12}$ |                                       |                                                    | 26.677                    | 167.414                                | 120.270                    | 415.796                                 | 438.528                    | 785.785                                 | 316.917                    | 373.966                                 | 841.728                                   | 932.099                                                |
| $\omega_{13}$ |                                       |                                                    |                           |                                        |                            |                                         |                            |                                         |                            |                                         | 715.023                                   | 684.506                                                |
| $\omega_{14}$ |                                       |                                                    |                           |                                        |                            |                                         |                            |                                         |                            |                                         | 485.690                                   | 484.785                                                |
| $\omega_{15}$ |                                       |                                                    |                           |                                        |                            |                                         |                            |                                         |                            |                                         | 465.565                                   | 389.136                                                |
| Species       | CH <sub>2</sub> -<br>OCH <sub>2</sub> | CH <sub>2</sub> -<br>OCH <sub>2</sub> <sup>+</sup> | CH <sub>3</sub> -CH-<br>O | CH <sub>3</sub> -CH-<br>O <sup>+</sup> | CH <sub>3</sub> -C-<br>O-H | CH <sub>3</sub> -C-<br>O-H <sup>+</sup> | CH-CH <sub>2</sub> -<br>OH | CH-CH <sub>2</sub> -<br>OH <sup>+</sup> | CH <sub>3</sub> -CO-<br>CO | CH <sub>3</sub> -CO-<br>CO <sup>+</sup> | CH <sub>2</sub> -CO-<br>CO <sub>2</sub> H | CH <sub>2</sub> -CO-<br>CO <sub>2</sub> H <sup>+</sup> |
| $\omega_1$    | 3222.382                              | 3193.072                                           | 3183.728                  | 3218.113                               | 3400.051                   | 3455.230                                | 3844.242                   | 3639.516                                | 3154.276                   | 3137.092                                | 3633.421                                  | 3696.662                                               |
| $\omega_2$    | 3207.620                              | 3174.758                                           | 3123.953                  | 3111.323                               | 3127.761                   | 3124.062                                | 3162.051                   | 3257.787                                | 3145.517                   | 3133.421                                | 3319.453                                  | 3222.012                                               |
| $\omega_3$    | 3121.913                              | 3095.674                                           | 3048.650                  | 3029.015                               | 3097.983                   | 3087.108                                | 3085.798                   | 3250.474                                | 3054.285                   | 3027.483                                | 3185.997                                  | 3126.560                                               |
| $\omega_4$    | 3113.705                              | 3059.203                                           | 2912.024                  | 2867.543                               | 2925.582                   | 3004.662                                | 3016.999                   | 3136.317                                | 2172.742                   | 2392.149                                | 1867.237                                  | 2000.173                                               |
| $\omega_5$    | 1533.068                              | 1432.995                                           | 1836.754                  | 1642.252                               | 1440.139                   | 1743.088                                | 1512.648                   | 1462.672                                | 1545.854                   | 2268.619                                | 1575.133                                  | 1732.403                                               |
| $\omega_6$    | 1483.564                              | 1391.763                                           | 1435.906                  | 1393.419                               | 1391.799                   | 1381.517                                | 1307.649                   | 1334.404                                | 1451.914                   | 1366.947                                | 1477.702                                  | 1490.232                                               |
| $\omega_7$    | 1324.133                              | 1289.356                                           | 1427.030                  | 1392.186                               | 1365.482                   | 1343.945                                | 1268.624                   | 1184.961                                | 1431.802                   | 1364.629                                | 1411.805                                  | 1441.630                                               |
| $\omega_8$    | 1162.302                              | 1154.828                                           | 1409.774                  | 1277.874                               | 1343.918                   | 1309.541                                | 1246.350                   | 1136.386                                | 1369.891                   | 1333.900                                | 1299.377                                  | 1266.772                                               |
| $\omega_9$    | 1159.422                              | 1151.334                                           | 1349.624                  | 1149.421                               | 1319.362                   | 1193.215                                | 1136.949                   | 1094.304                                | 1237.981                   | 1006.298                                | 1194.083                                  | 1152.108                                               |
| $\omega_{10}$ | 1148.749                              | 1138.228                                           | 1127.817                  | 1028.968                               | 1054.023                   | 1025.134                                | 1042.914                   | 1081.073                                | 997.802                    | 993.663                                 | 1007.888                                  | 1126.441                                               |
| $\omega_{11}$ | 1148.677                              | 1010.253                                           | 1122.236                  | 986.829                                | 962.815                    | 959.049                                 | 1012.473                   | 961.485                                 | 984.940                    | 938.082                                 | 873.562                                   | 994.965                                                |
| $\omega_{12}$ | 1039.590                              | 868.460                                            | 901.409                   | 877.262                                | 920.868                    | 910.318                                 | 916.701                    | 873.200                                 | 763.953                    | 416.801                                 | 795.778                                   | 993.635                                                |
| $\omega_{13}$ | 921.517                               | 785.329                                            | 762.787                   | 752.338                                | 730.834                    | 606.805                                 | 893.992                    | 829.502                                 | 653.431                    | 395.554                                 | 774.149                                   | 885.058                                                |
| $\omega_{14}$ | 884.737                               | 564.595                                            | 504.254                   | 374.902                                | 523.446                    | 423.508                                 | 554.110                    | 708.147                                 | 437.861                    | 151.420                                 | 739.515                                   | 773.995                                                |
| $\omega_{15}$ | 811.186                               | 560.367                                            | 164.126                   | 164.156                                | 139.588                    | 141.346                                 | 344.339                    | 587.149                                 | 399.531                    | 126.006                                 | 608.787                                   | 731.079                                                |
| $\omega_{16}$ |                                       |                                                    |                           |                                        |                            |                                         |                            |                                         | 166.669                    | 102.520                                 | 536.323                                   | 673.991                                                |
| $\omega_{17}$ |                                       |                                                    |                           |                                        |                            |                                         |                            |                                         | 155.827                    | 98.751                                  | 453.235                                   | 627.151                                                |
| $\omega_{18}$ |                                       |                                                    |                           |                                        |                            |                                         |                            |                                         | 104.723                    | 78.523                                  | 393.239                                   | 551.346                                                |
| $\omega_{19}$ |                                       |                                                    |                           |                                        |                            |                                         |                            |                                         |                            |                                         | 387.934                                   | 321.441                                                |
| $\omega_{20}$ |                                       |                                                    |                           |                                        |                            |                                         |                            |                                         |                            |                                         | 261.852                                   | 250.214                                                |

| $\omega_{21}$ |                                         |                                                      |                                          |                                                       |                             |                                          |                             |                                          |                                             |  | 105.089                                     | 201.470                                                  |
|---------------|-----------------------------------------|------------------------------------------------------|------------------------------------------|-------------------------------------------------------|-----------------------------|------------------------------------------|-----------------------------|------------------------------------------|---------------------------------------------|--|---------------------------------------------|----------------------------------------------------------|
|               | CH <sub>3</sub> -CO-<br>CO <sub>2</sub> | CH <sub>3</sub> -CO-<br>CO <sub>2</sub> <sup>+</sup> | CH <sub>3</sub> -C-<br>CO <sub>2</sub> H | CH <sub>3</sub> -C-<br>CO <sub>2</sub> H <sup>+</sup> | CH <sub>3</sub> -CO-<br>CHO | CH <sub>3</sub> -CO-<br>CHO <sup>+</sup> | CH <sub>3</sub> -CO-<br>COH | CH <sub>3</sub> -CO-<br>COH <sup>+</sup> | CH <sub>2</sub> -CO-<br>CO <sub>2</sub> H-1 |  | CH <sub>2</sub> -CO-<br>CO <sub>2</sub> H-2 | CH <sub>2</sub> -CO-<br>CO <sub>2</sub> H-2 <sup>+</sup> |
| $\omega_1$    | 3197.131                                | 3185.440                                             | 3811.398                                 | 3718.319                                              | 3198.930                    | 3191.706                                 | 3195.019                    | 3335.795                                 | 3786.937                                    |  | 3792.999                                    | 3632.499                                                 |
| $\omega_2$    | 3057.189                                | 3050.798                                             | 3141.717                                 | 3170.142                                              | 3064.114                    | 3139.758                                 | 3087.583                    | 3202.326                                 | 3316.425                                    |  | 3319.270                                    | 3226.074                                                 |
| $\omega_3$    | 1838.724                                | 2997.617                                             | 3059.370                                 | 3119.295                                              | 2973.444                    | 3049.075                                 | 3051.930                    | 3040.885                                 | 3184.876                                    |  | 3186.438                                    | 3128.959                                                 |
| $\omega_4$    | 1603.899                                | 2050.791                                             | 2947.302                                 | 3037.202                                              | 1827.417                    | 3017.889                                 | 1797.818                    | 1916.529                                 | 1867.304                                    |  | 1825.888                                    | 2003.218                                                 |
| $\omega_5$    | 1420.515                                | 1601.365                                             | 1732.835                                 | 2040.258                                              | 1814.256                    | 1995.119                                 | 1449.990                    | 1693.278                                 | 1555.890                                    |  | 1566.087                                    | 1736.088                                                 |
| $\omega_6$    | 1370.747                                | 1395.981                                             | 1478.140                                 | 1434.622                                              | 1423.093                    | 1947.772                                 | 1438.554                    | 1409.081                                 | 1455.641                                    |  | 1470.178                                    | 1483.471                                                 |
| $\omega_7$    | 1219.013                                | 1382.842                                             | 1473.496                                 | 1396.838                                              | 1374.755                    | 1406.682                                 | 1414.669                    | 1354.214                                 | 1380.849                                    |  | 1404.589                                    | 1439.518                                                 |
| $\omega_8$    | 1070.073                                | 1361.360                                             | 1350.425                                 | 1380.644                                              | 1343.310                    | 1391.065                                 | 1369.384                    | 1130.964                                 | 1250.819                                    |  | 1272.090                                    | 1261.027                                                 |
| $\omega_9$    | 962.327                                 | 1261.950                                             | 1289.846                                 | 1367.975                                              | 1261.101                    | 1328.768                                 | 1220.181                    | 1079.619                                 | 1172.848                                    |  | 1178.555                                    | 1152.110                                                 |
| $\omega_{10}$ | 757.336                                 | 1027.420                                             | 1227.691                                 | 1298.333                                              | 1001.962                    | 1120.352                                 | 987.347                     | 978.157                                  | 1012.712                                    |  | 1006.866                                    | 1122.890                                                 |
| $\omega_{11}$ | 589.279                                 | 960.479                                              | 1136.660                                 | 1127.844                                              | 805.536                     | 1015.737                                 | 759.257                     | 606.453                                  | 865.763                                     |  | 869.265                                     | 992.907                                                  |
| $\omega_{12}$ | 504.359                                 | 957.247                                              | 1054.889                                 | 992.570                                               | 573.359                     | 1011.163                                 | 654.562                     | 507.275                                  | 768.310                                     |  | 768.935                                     | 992.084                                                  |
| $\omega_{13}$ | 352.789                                 | 824.883                                              | 868.217                                  | 965.703                                               | 482.394                     | 929.330                                  | 442.085                     | 366.573                                  | 757.553                                     |  | 764.470                                     | 859.996                                                  |
| $\omega_{14}$ | 179.749                                 | 737.470                                              | 785.711                                  | 782.436                                               | 245.027                     | 834.992                                  | 304.450                     | 241.695                                  | 633.153                                     |  | 652.475                                     | 762.161                                                  |
| $\omega_{15}$ | 3132.092                                | 712.917                                              | 653.069                                  | 547.968                                               | 3138.828                    | 560.248                                  | 3121.632                    | 3113.416                                 | 610.672                                     |  | 587.757                                     | 732.659                                                  |
| $\omega_{16}$ | 1427.899                                | 693.487                                              | 529.490                                  | 524.474                                               | 1429.062                    | 454.414                                  | 1421.556                    | 1401.656                                 | 492.411                                     |  | 525.386                                     | 710.417                                                  |
| $\omega_{17}$ | 1020.271                                | 503.272                                              | 469.465                                  | 506.390                                               | 1070.655                    | 410.383                                  | 1080.425                    | 1011.714                                 | 429.033                                     |  | 433.370                                     | 625.933                                                  |
| $\omega_{18}$ | 680.798                                 | 321.788                                              | 326.802                                  | 502.734                                               | 892.460                     | 308.411                                  | 925.692                     | 742.370                                  | 410.700                                     |  | 395.374                                     | 542.474                                                  |
| $\omega_{19}$ | 372.268                                 | 263.684                                              | 240.122                                  | 258.021                                               | 468.322                     | 227.198                                  | 459.960                     | 456.520                                  | 371.841                                     |  | 381.201                                     | 317.854                                                  |
| $\omega_{20}$ | 113.816                                 | 240.332                                              | 166.197                                  | 194.006                                               | 126.679                     | 123.760                                  | 153.244                     | 159.841                                  | 269.300                                     |  | 258.637                                     | 263.620                                                  |
| $\omega_{21}$ | 63.841                                  | 128.251                                              | 143.396                                  | 115.441                                               | 85.894                      | 20.350                                   | 110.882                     | 108.722                                  | 40.183                                      |  | 50.997                                      | 199.155                                                  |



|                 | CH <sub>2</sub> -<br>COH-<br>CO <sub>2</sub> | CH <sub>2</sub> -<br>COH-<br>CO <sub>2</sub> <sup>+</sup> | CH-COH-<br>CO <sub>2</sub> H <sup>+</sup> | CH-COH-<br>CO <sub>2</sub> H <sup>+</sup> |  |  |  |  |  |  |  |  |
|-----------------|----------------------------------------------|-----------------------------------------------------------|-------------------------------------------|-------------------------------------------|--|--|--|--|--|--|--|--|
| ω <sub>1</sub>  | 3738.442                                     | 3578.466                                                  | 3797.710                                  | 3694.553                                  |  |  |  |  |  |  |  |  |
| ω <sub>2</sub>  | 3305.322                                     | 3139.862                                                  | 3687.688                                  | 3639.033                                  |  |  |  |  |  |  |  |  |
| ω <sub>3</sub>  | 3195.310                                     | 3067.786                                                  | 3317.175                                  | 3349.355                                  |  |  |  |  |  |  |  |  |
| ω <sub>4</sub>  | 1755.281                                     | 1976.521                                                  | 1799.475                                  | 1944.336                                  |  |  |  |  |  |  |  |  |
| ω <sub>5</sub>  | 1591.909                                     | 1765.945                                                  | 1714.739                                  | 1887.309                                  |  |  |  |  |  |  |  |  |
| ω <sub>6</sub>  | 1416.721                                     | 1412.788                                                  | 1444.228                                  | 1334.437                                  |  |  |  |  |  |  |  |  |
| ω <sub>7</sub>  | 1378.748                                     | 1361.557                                                  | 1335.788                                  | 1304.584                                  |  |  |  |  |  |  |  |  |
| ω <sub>8</sub>  | 1274.336                                     | 1298.850                                                  | 1230.055                                  | 1223.958                                  |  |  |  |  |  |  |  |  |
| ω <sub>9</sub>  | 1164.291                                     | 1119.652                                                  | 1183.862                                  | 1173.801                                  |  |  |  |  |  |  |  |  |
| ω <sub>10</sub> | 975.335                                      | 1095.508                                                  | 883.651                                   | 908.308                                   |  |  |  |  |  |  |  |  |
| ω <sub>11</sub> | 907.775                                      | 1018.485                                                  | 806.402                                   | 735.193                                   |  |  |  |  |  |  |  |  |
| ω <sub>12</sub> | 786.066                                      | 973.926                                                   | 757.127                                   | 698.645                                   |  |  |  |  |  |  |  |  |
| ω <sub>13</sub> | 772.184                                      | 961.442                                                   | 657.733                                   | 605.046                                   |  |  |  |  |  |  |  |  |
| ω <sub>14</sub> | 712.350                                      | 830.885                                                   | 604.420                                   | 596.570                                   |  |  |  |  |  |  |  |  |
| ω <sub>15</sub> | 588.719                                      | 804.980                                                   | 598.813                                   | 568.431                                   |  |  |  |  |  |  |  |  |
| ω <sub>16</sub> | 478.623                                      | 697.264                                                   | 549.843                                   | 440.697                                   |  |  |  |  |  |  |  |  |
| ω <sub>17</sub> | 447.616                                      | 614.072                                                   | 509.574                                   | 398.121                                   |  |  |  |  |  |  |  |  |
| ω <sub>18</sub> | 378.453                                      | 562.062                                                   | 398.970                                   | 324.486                                   |  |  |  |  |  |  |  |  |
| ω <sub>19</sub> | 353.191                                      | 305.551                                                   | 379.808                                   | 309.064                                   |  |  |  |  |  |  |  |  |
| ω <sub>20</sub> | 224.380                                      | 253.859                                                   | 260.564                                   | 227.374                                   |  |  |  |  |  |  |  |  |
| ω <sub>21</sub> | 87.321                                       | 147.036                                                   | 110.046                                   | 90.778                                    |  |  |  |  |  |  |  |  |

**Table S20:** Cartesian coordinates (in Å) of pyruvic acid, ionized pyruvic acid and its fragments as obtained after geometry optimizations at the PBE0/aug-cc-pVDZ level of theory. All species are taken in their electronic ground state.

|                                                                                                                                                                                                                                                                                                                                                                                                       |                                                                                                                                                                                                                                                                                                                                                                                                       |
|-------------------------------------------------------------------------------------------------------------------------------------------------------------------------------------------------------------------------------------------------------------------------------------------------------------------------------------------------------------------------------------------------------|-------------------------------------------------------------------------------------------------------------------------------------------------------------------------------------------------------------------------------------------------------------------------------------------------------------------------------------------------------------------------------------------------------|
| <b>Tc</b>                                                                                                                                                                                                                                                                                                                                                                                             | <b>Tc<sup>+</sup></b>                                                                                                                                                                                                                                                                                                                                                                                 |
| O 1.06946700 1.30464200 0.00000000<br>C 0.00000000 0.72818200 0.00000000<br>C 0.03051300 -0.81407300 0.00000000<br>C -1.33449600 1.38528600 0.00000000<br>O -0.96416000 -1.49105900 0.00000000<br>O 1.26940200 -1.29500600 0.00000000<br>H 1.85840700 -0.51499100 0.00000000<br>H -1.22105800 2.47267500 0.00000000<br>H -1.90556200 1.04867000 0.87679600<br>H -1.90556200 1.04867000 -0.87679600    | O 1.08467200 1.31302000 0.00000000<br>C 0.00000000 0.86640500 0.00000000<br>C 0.07446600 -0.91584200 0.00000000<br>C -1.37282000 1.40313800 0.00000000<br>O -0.98551900 -1.43579300 0.00000000<br>O 1.27047700 -1.37361400 0.00000000<br>H 1.94614500 -0.66779200 0.00000000<br>H -1.32767000 2.49756900 0.00000000<br>H -1.89269700 1.00955400 0.88720400<br>H -1.89269700 1.00955400 -0.88720400    |
| <b>Tt</b>                                                                                                                                                                                                                                                                                                                                                                                             | <b>Tt<sup>+</sup></b>                                                                                                                                                                                                                                                                                                                                                                                 |
| C 1.75394600 0.77395700 0.00024500<br>H 1.62254100 1.42193600 0.87807200<br>H 1.62337900 1.42136200 -0.87811800<br>H 2.74668300 0.31570600 0.00078200<br>C 0.70978200 -0.29727100 0.00000600<br>C -0.74419500 0.21499900 -0.00002700<br>O -1.63583100 -0.77613200 0.00028300<br>H -2.51248000 -0.36347600 0.00026200<br>O -1.02364000 1.39027500 -0.00029400<br>O 0.93480600 -1.48234700 -0.00028200  | O 0.82509500 -1.48203300 -0.22541100<br>C 0.76937200 -0.32254800 -0.02691200<br>C -0.82257200 0.25701300 -0.01718200<br>C 1.80718400 0.71367300 0.18743900<br>O -0.96017000 1.41384300 -0.23086900<br>O -1.62066100 -0.72930000 0.22841800<br>H -2.55273200 -0.43496200 0.24371100<br>H 2.80099100 0.26124100 0.12023900<br>H 1.63003800 1.17208900 1.17301300<br>H 1.64368600 1.49272700 -0.57414000 |
| <b>Ct</b>                                                                                                                                                                                                                                                                                                                                                                                             | <b>Cc</b>                                                                                                                                                                                                                                                                                                                                                                                             |
| C 1.60162400 0.96285200 0.00002100<br>H 1.37670000 1.58205200 0.87982100<br>H 1.37671600 1.58207200 -0.87976700<br>H 2.65386100 0.66410200 0.00003600<br>C 0.73748600 -0.26122100 -0.00000300<br>C -0.79803900 -0.06555900 0.00000200<br>O -1.13484700 1.23991800 -0.00002600<br>H -2.10330700 1.27889900 -0.00002500<br>O -1.59135300 -0.96527200 0.00003000<br>O 1.15740100 -1.39009200 -0.00002700 | O 0.90413200 1.55152200 0.00000000<br>C 0.00000000 0.75876700 0.00000000<br>C 0.35302700 -0.75642800 0.00000000<br>C -1.45134200 1.16674200 0.00000000<br>O 1.48182600 -1.14728100 0.00000000<br>O -0.68971000 -1.61546600 0.00000000<br>H -1.52820300 -1.13911500 0.00000000<br>H -1.51729100 2.25879200 0.00000000<br>H -1.96729900 0.77782500 0.89250800<br>H -1.96729900 0.77782500 -0.89250800   |
| <b>enolPACc</b>                                                                                                                                                                                                                                                                                                                                                                                       | <b>enolPACc<sup>+</sup></b>                                                                                                                                                                                                                                                                                                                                                                           |
| O 1.39603000 -1.11883200 -0.00041400<br>C 0.75465100 0.06767400 0.00013900<br>C -0.72344500 -0.08092200 -0.00005600<br>C 1.38291900 1.24968400 0.00031900<br>O -1.41747400 1.06164100 -0.00054800<br>O -1.24196100 -1.18085900 0.00071600<br>H 0.80325700 2.16742400 0.00009500<br>H 2.46982300 1.30312400 0.00021400<br>H 0.70309400 -1.80017100 -0.00051800<br>H -2.35368100 0.81541000 -0.00024100 | O 1.25952800 -1.16928800 0.00006900<br>C 0.73571800 -0.00263200 0.00002400<br>C -0.78712200 -0.03372200 -0.00007900<br>C 1.55693700 1.14095000 0.00010500<br>O -1.32929200 1.15930200 0.00010100<br>O -1.30372600 -1.12127400 -0.00025600<br>H 1.10124300 2.13097700 0.00007900<br>H 2.64276700 1.02761900 0.00019900<br>H 0.51181300 -1.82960600 0.00005300<br>H -2.30110200 1.09351400 0.00005400   |
| <b>enolPATc</b>                                                                                                                                                                                                                                                                                                                                                                                       | <b>enolPATc<sup>+</sup></b>                                                                                                                                                                                                                                                                                                                                                                           |

|                                                                                                                                                                                                                                                                                                                                                                                                                            |                                                                                                                                                                                                                                                                                                                                                                                                                                        |
|----------------------------------------------------------------------------------------------------------------------------------------------------------------------------------------------------------------------------------------------------------------------------------------------------------------------------------------------------------------------------------------------------------------------------|----------------------------------------------------------------------------------------------------------------------------------------------------------------------------------------------------------------------------------------------------------------------------------------------------------------------------------------------------------------------------------------------------------------------------------------|
| O 1.20240400 -1.28508400 0.00000000<br>C 0.75618100 -0.00410600 -0.00017700<br>C -0.71738800 0.21322400 -0.00000100<br>C 1.58567300 1.04508400 0.00004200<br>O -1.37985300 -0.97141900 0.00006400<br>O -1.28421500 1.27709800 -0.00004800<br>H 1.16666000 2.04702100 0.00024400<br>H 2.66448400 0.90496900 0.00029900<br>H 0.44047000 -1.87668500 -0.00005300<br>H -2.32509100 -0.76528600 0.00019400                      | O 1.12472400 -1.30047100 0.00000400<br>C 0.72321700 -0.07886400 -0.00004800<br>C -0.76048800 0.23440500 -0.00055100<br>C 1.67517800 0.95807800 0.00025500<br>O -1.44625500 -0.90314100 0.00022000<br>O -1.16014600 1.36166100 -0.00010300<br>H 1.32505000 1.99077400 0.00016300<br>H 2.74010400 0.71947100 0.00056400<br>H 0.36502400 -1.92249600 -0.00029100<br>H -2.40420000 -0.73384800 0.00066100                                  |
| <b>enolPATt</b><br>O -1.16172500 -1.27475900 -0.00018400<br>C -0.73697300 0.01335800 -0.00001000<br>C 0.75037100 0.15604900 -0.00000300<br>C -1.50837000 1.10686200 0.00015400<br>O 1.38256500 -1.02766300 0.00020300<br>O 1.32879200 1.21775900 -0.00019400<br>H -1.03476900 2.08464800 0.00026700<br>H -2.59657200 1.04431600 0.00018400<br>H -2.12478000 -1.28631900 0.00000200<br>H 2.32890400 -0.82295500 0.00009900  |                                                                                                                                                                                                                                                                                                                                                                                                                                        |
| <b>enolPACt</b><br>O -1.38004900 -1.12405100 -0.00010900<br>C -0.73042600 0.06262000 -0.00010600<br>C 0.74880000 -0.14018700 -0.00005300<br>C -1.29925400 1.27568400 0.00013500<br>O 1.43227500 1.02236700 -0.00010100<br>O 1.28635400 -1.21938700 0.00014800<br>H -0.67928800 2.16662100 -0.00014100<br>H -2.38311300 1.39764400 0.00039900<br>H -2.32894700 -0.96065300 0.00017200<br>H 2.36799200 0.77624500 0.00021400 | <b>enolPACt<sup>+</sup></b><br>O -1.29014500 -1.15475900 0.00000500<br>C -0.71470400 -0.00843200 -0.00003400<br>C 0.81050500 -0.11732400 -0.00020000<br>C -1.41473200 1.22075200 0.00006100<br>O 1.34105500 1.09888100 -0.00002900<br>O 1.35232200 -1.17955300 0.00009900<br>H -0.85060400 2.15338500 -0.00010400<br>H -2.50764600 1.25093700 0.00030300<br>H -2.26539800 -1.12055400 0.00008700<br>H 2.31138100 1.02970600 0.00014800 |
| <b>CH3CO</b><br>C 1.16474000 -0.09877600 -0.00011800<br>H 1.68309500 0.29972000 -0.88205000<br>H 1.18259800 -1.19871600 -0.00109400<br>H 1.68166300 0.29734800 0.88387300<br>C -0.23990800 0.42568700 0.00004600<br>O -1.26204400 -0.16997700 -0.00003800                                                                                                                                                                  | <b>CH3CO<sup>+</sup></b><br>C 1.21123400 -0.00010400 -0.00001600<br>H 1.55350900 -1.04833000 -0.04706800<br>H 1.55294000 0.48391500 0.93131100<br>H 1.55299200 0.56557100 -0.88409400<br>C -0.21282200 -0.00017700 -0.00001700<br>O -1.33123900 0.00006600 0.00000600                                                                                                                                                                  |
| <b>HOCO</b><br>H 1.74804100 0.47074800 0.00003000<br>C -0.12835900 0.38636900 -0.00000600<br>O -1.18798100 -0.13572000 0.00000400<br>O 1.06574500 -0.21290100 -0.00000300                                                                                                                                                                                                                                                  | <b>HOCO<sup>+</sup></b><br>H 1.66801400 0.70109100 0.00000600<br>C -0.10865500 0.01159600 -0.00001600<br>O -1.23480800 0.01644100 0.00000600<br>O 1.10779800 -0.11277500 0.00000500                                                                                                                                                                                                                                                    |
| <b>CH<sub>3</sub></b><br>C 0.00000000 0.00000000 0.00001300<br>H 0.00000000 1.08758900 -0.00002500<br>H 0.94188000 -0.54379400 -0.00002500<br>H -0.94188000 -0.54379400 -0.00002500                                                                                                                                                                                                                                        | <b>CH<sub>3</sub><sup>+</sup></b><br>C 0.00000000 0.00000000 -0.00000300<br>H 0.00000000 1.10089700 0.00000600<br>H 0.95340500 -0.55044900 0.00000600<br>H -0.95340500 -0.55044900 0.00000600                                                                                                                                                                                                                                          |
| <b>COCOOH</b>                                                                                                                                                                                                                                                                                                                                                                                                              | <b>COCOOH<sup>+</sup></b>                                                                                                                                                                                                                                                                                                                                                                                                              |

|                                                                                                                                                                                                                                                                                                                                                             |                                                                                                                                                                                                                                                                                                                                                                          |
|-------------------------------------------------------------------------------------------------------------------------------------------------------------------------------------------------------------------------------------------------------------------------------------------------------------------------------------------------------------|--------------------------------------------------------------------------------------------------------------------------------------------------------------------------------------------------------------------------------------------------------------------------------------------------------------------------------------------------------------------------|
| O 2.07202600 -0.09738500 -0.00009400<br>C 0.95862200 -0.15959600 0.00011800<br>C -0.59912900 0.12107000 0.00017900<br>O -1.19669900 -1.02396700 -0.00001100<br>O -0.87357100 1.26614500 -0.00006000<br>H -2.17100900 -0.92719100 -0.00045900                                                                                                                | O 2.07202600 -0.09738500 -0.00009400<br>C 0.95862200 -0.15959600 0.00011800<br>C -0.59912900 0.12107000 0.00017900<br>O -1.19669900 -1.02396700 -0.00001100<br>O -0.87357100 1.26614500 -0.00006000<br>H -2.17100900 -0.92719100 -0.00045900                                                                                                                             |
| <b>OH</b><br>O 0.00000000 0.00000000 0.10840100<br>H 0.00000000 0.00000000 -0.86720700                                                                                                                                                                                                                                                                      | <b>OH<sup>+</sup></b><br>O 0.00000000 0.00000000 0.11516900<br>H 0.00000000 0.00000000 -0.92134800                                                                                                                                                                                                                                                                       |
| <b>CH<sub>3</sub>-CO-CO</b><br>O -0.75247000 1.39157500 -0.00004300<br>C -0.44315800 0.17848800 0.00002900<br>C 0.92631900 -0.10654300 0.00029300<br>C -1.41360500 -0.96743500 -0.00003500<br>O 2.07697600 -0.25306000 -0.00014400<br>H -0.90592900 -1.94109700 0.00004100<br>H -2.05360200 -0.89703000 -0.89003300<br>H -2.05385900 -0.89705700 0.88976700 | <b>CH<sub>3</sub>-CO-CO<sup>+</sup></b><br>O -1.28446900 1.35842400 -0.00004900<br>C -1.33098800 0.24047500 0.00013300<br>C 1.62671300 -0.09324400 0.00004700<br>C -1.48804700 -1.17584800 -0.00003600<br>O 2.75008800 -0.01972100 -0.00002600<br>H -1.00088800 -1.57312900 0.90515100<br>H -1.00041900 -1.57286100 -0.90508800<br>H -2.56971600 -1.39193200 -0.00032400 |
| <b>CH<sub>2</sub>-CH-OH</b><br>C -1.20143500 -0.20561100 0.00001700<br>H -2.12898400 0.36177900 -0.00013300<br>H -1.26673600 -1.29525000 0.00028600<br>C -0.03251500 0.43932600 -0.00004600<br>H 0.03304600 1.52817100 -0.00008600<br>O 1.20556200 -0.11516200 0.00010500<br>H 1.12188200 -1.07569600 -0.00073400                                           | <b>CH<sub>2</sub>-CH-OH<sup>+</sup></b><br>C -1.21946600 -0.19794600 -0.00004500<br>H -2.13276900 0.39902500 0.00045000<br>H -1.29603500 -1.28881800 -0.00024900<br>C 0.03099000 0.45723100 -0.00000100<br>H 0.11356000 1.54880200 -0.00021600<br>O 1.16605800 -0.13761300 0.00001400<br>H 1.11763500 -1.11381500 0.00018000                                             |
| <b>CH<sub>2</sub>-OCH<sub>2</sub></b><br>C 0.73226900 -0.37113900 0.00001100<br>H 1.27032800 -0.58842600 -0.92620700<br>H 1.27034800 -0.58826800 0.92625700<br>O -0.00025700 0.85128000 -0.00002800<br>C -0.73200400 -0.37158300 0.00001200<br>H -1.27012800 -0.58853100 0.92624500<br>H -1.27008200 -0.58868400 -0.92621400                                | <b>CH<sub>2</sub>-OCH<sub>2</sub><sup>+</sup></b><br>C 0.73103400 -0.40188800 0.00002500<br>H 1.30449600 -0.51580400 -0.92985900<br>H 1.30474400 -0.51544800 0.92979800<br>O 0.00053200 0.85997100 -0.00004200<br>C -0.73163000 -0.40142800 0.00003300<br>H -1.30498800 -0.51426300 0.93004400<br>H -1.30493300 -0.51436200 -0.92999500                                  |
| <b>CH<sub>3</sub>-CH-O</b><br>C 1.16353800 -0.15032400 0.00003200<br>H 1.15433400 -1.24545500 -0.00069600<br>H 1.70263100 0.22877500 -0.88164500<br>H 1.70231500 0.22800500 0.88217300<br>C -0.22936500 0.39702200 0.00002100<br>H -0.30439400 1.51228900 -0.00020600<br>O -1.23249100 -0.27547500 0.00000700                                               | <b>CH<sub>3</sub>-CH-O<sup>+</sup></b><br>C 1.16966900 -0.15324100 0.00004600<br>H 1.16986600 -1.24675500 -0.00048400<br>H 1.65864400 0.27616900 -0.89171500<br>H 1.65861900 0.27546400 0.89207600<br>C -0.22269900 0.39065100 -0.00011700<br>H -0.38993200 1.50098400 0.00022200<br>O -1.22237700 -0.27879000 0.00004100                                                |
| <b>CH<sub>3</sub>-C-O-H</b><br>C -1.13277500 0.14649000 0.00000500<br>H -1.72534100 -0.15980200 -0.87583000<br>H -1.72537800 -0.15946700 0.87591700<br>H -0.99913900 1.25106700 -0.00020000<br>C 0.12936200 -0.64206800 0.00001300<br>O 1.18699100 0.11978700 -0.00000100<br>H 0.97440900 1.08336900 0.00001600                                             | <b>CH<sub>3</sub>-C-O-H<sup>+</sup></b><br>C -1.22706000 0.11805700 0.00003000<br>H -1.75124000 -0.30098100 -0.87850000<br>H -1.75040800 -0.29978100 0.87961200<br>H -1.24964600 1.22001800 -0.00089500<br>C 0.10826100 -0.41789500 -0.00011800<br>O 1.25969800 0.02205300 0.00003300<br>H 1.38650400 1.00335000 0.00004800                                              |

|                                                                                                                                                                                                                                                                                                                                                                                                                                                                    |                                                                                                                                                                                                                                                                                                                                                                                                                                                                                    |
|--------------------------------------------------------------------------------------------------------------------------------------------------------------------------------------------------------------------------------------------------------------------------------------------------------------------------------------------------------------------------------------------------------------------------------------------------------------------|------------------------------------------------------------------------------------------------------------------------------------------------------------------------------------------------------------------------------------------------------------------------------------------------------------------------------------------------------------------------------------------------------------------------------------------------------------------------------------|
| <p style="text-align: center;"><b>CH-CH<sub>2</sub>-OH</b></p> <p>C -0.93697300 0.46963600 -0.20001000<br/> H -1.25778900 0.78112900 0.81620600<br/> C -0.11937300 -0.75287500 -0.00523900<br/> H -0.09227000 -1.31782000 0.93481600<br/> O 0.81113500 0.37132000 0.13754900<br/> H 1.08965500 0.64545200 -0.74537000<br/> H 0.10940200 -1.37988600 -0.87455200</p>                                                                                                | <p style="text-align: center;"><b>CH-CH<sub>2</sub>-OH<sup>+</sup></b></p> <p>C 0.22991900 0.83130600 -0.17806100<br/> H 0.69860900 1.64549600 0.37596700<br/> C -0.86097000 -0.08151100 0.00304800<br/> H -1.35726100 -0.17738400 0.97321900<br/> O 0.60812100 -0.55126500 0.15041300<br/> H 0.93650400 -1.04145200 -0.63242400<br/> H -1.35651400 -0.51530800 -0.86999100</p>                                                                                                    |
| <p style="text-align: center;"><b>CO<sub>2</sub></b></p> <p>C 0.00000000 0.00000000 0.00000000<br/> O 0.00000000 0.00000000 1.16366000<br/> O 0.00000000 0.00000000 -1.16366000</p>                                                                                                                                                                                                                                                                                | <p style="text-align: center;"><b>CO<sub>2</sub><sup>+</sup></b></p> <p>C 0.00000000 0.00000000 0.00000000<br/> O 0.00000000 0.00000000 1.17476600<br/> O 0.00000000 0.00000000 -1.17476600</p>                                                                                                                                                                                                                                                                                    |
| <p style="text-align: center;"><b>CH<sub>2</sub>-CO-CO<sub>2</sub>H</b></p> <p>O 1.01728500 -1.36603600 -0.00008800<br/> C 0.73667100 -0.15830700 -0.00005500<br/> C -0.74749500 0.22806000 -0.00001000<br/> C 1.69807800 0.88635000 0.00012200<br/> O -1.13646500 1.36742400 -0.00010700<br/> O -1.54352800 -0.83614700 0.00011300<br/> H -0.95154100 -1.61382800 0.00011300<br/> H 2.75631900 0.63020300 -0.00005700<br/> H 1.37336500 1.92508200 0.00025800</p> | <p style="text-align: center;"><b>CH<sub>2</sub>-CO-CO<sub>2</sub>H<sup>+</sup></b></p> <p>O 1.49446600 -1.33590100 0.00004600<br/> C 0.82884300 -0.36853300 -0.00016200<br/> C -0.70991200 -0.06987900 -0.00006000<br/> C 0.95145600 1.15584300 0.00004700<br/> O -0.55409700 1.20303400 -0.00003100<br/> O -1.85017700 -0.61122800 0.00004200<br/> H -1.81249600 -1.58728200 0.00007100<br/> H 1.33451400 1.61797600 -0.91634300<br/> H 1.33412400 1.61748700 0.91686500</p>     |
| <p style="text-align: center;"><b>CH<sub>3</sub>-CO-CO<sub>2</sub></b></p> <p>O 1.00929400 1.41736300 0.00000000<br/> C 0.00000000 0.75605800 0.00000000<br/> C 0.16938800 -0.76670600 0.00000000<br/> C -1.39737600 1.27439700 0.00000000<br/> O -0.75383800 -1.59306300 0.00000000<br/> O 1.32272200 -1.29060900 0.00000000<br/> H -1.39268100 2.36812400 0.00000000<br/> H -1.93241000 0.88992500 0.88100500<br/> H -1.93241000 0.88992500 -0.88100500</p>      | <p style="text-align: center;"><b>CH<sub>3</sub>-CO-CO<sub>2</sub><sup>+</sup></b></p> <p>O -0.41385600 1.23929400 0.00016100<br/> C -0.67523200 -0.00774900 -0.00006800<br/> C 0.82590400 -0.34328400 -0.00007300<br/> C -1.96629400 -0.63176800 -0.00005400<br/> O 1.57186100 -1.23608600 0.00009700<br/> O 1.05475000 1.04969500 -0.00012500<br/> H -2.78893500 0.09188900 -0.00001500<br/> H -2.00966600 -1.30902500 0.87621600<br/> H -2.00970900 -1.30928700 -0.87608900</p> |
| <p style="text-align: center;"><b>CH<sub>3</sub>-C-CO<sub>2</sub>H</b></p> <p>C -0.73036600 -0.16209700 -0.65357700<br/> C 0.54463700 0.09634900 -0.07357900<br/> C -1.89437600 -0.13800600 0.22453500<br/> O 0.76180400 1.29126200 0.05844100<br/> O 1.47703100 -0.83703500 0.16455300<br/> H 1.15383700 -1.69849000 -0.13292100<br/> H -2.83358800 0.10455300 -0.28746500<br/> H -1.78267700 0.40603200 1.17619100<br/> H -1.96761900 -1.22338400 0.47596700</p> | <p style="text-align: center;"><b>CH<sub>3</sub>-C-CO<sub>2</sub>H<sup>+</sup></b></p> <p>C -0.62074300 -0.09563000 0.00036400<br/> C 0.71391000 -0.06307000 0.00009700<br/> C -2.03713900 -0.38073000 -0.00017200<br/> O 0.17158400 1.15896000 -0.00007200<br/> O 1.92873300 -0.41400900 -0.00004100<br/> H 2.05450200 -1.38109200 -0.00045800<br/> H -2.50295200 0.06335700 -0.89439300<br/> H -2.50327500 0.06232900 0.89447500<br/> H -2.18698400 -1.46762500 -0.00045700</p>  |
| <p style="text-align: center;"><b>CH<sub>3</sub>-CO-CHO</b></p> <p>O 0.60250700 1.60264600 0.00000000<br/> C 0.00000000 0.55036900 0.00000000<br/> C 0.83219200 -0.73402600 0.00000000<br/> C -1.48759700 0.41038800 0.00000000<br/> O 0.34318700 -1.83567100 0.00000000<br/> H -1.95673200 1.39821600 0.00000000</p>                                                                                                                                              | <p style="text-align: center;"><b>CH<sub>3</sub>-CO-CHO<sup>+</sup></b></p> <p>O -1.24142000 -1.17352300 -0.13378400<br/> C -0.64608700 -0.18021100 0.01824300<br/> C 1.10301700 -0.49711700 0.20334500<br/> C -0.95458000 1.26615100 0.06558700<br/> O 1.83325800 0.31548100 -0.19409300<br/> H -0.34802200 1.76683200 -0.70453900</p>                                                                                                                                            |

|                                                                                                                                                                                                                                                                                                                                                                                                                |                                                                                                                                                                                                                                                                                                                                                                                                                            |
|----------------------------------------------------------------------------------------------------------------------------------------------------------------------------------------------------------------------------------------------------------------------------------------------------------------------------------------------------------------------------------------------------------------|----------------------------------------------------------------------------------------------------------------------------------------------------------------------------------------------------------------------------------------------------------------------------------------------------------------------------------------------------------------------------------------------------------------------------|
| H -1.80378700 -0.17041300 0.87820700<br>H -1.80378700 -0.17041300 -0.87820700<br>H 1.93118800 -0.55358200 0.00000000                                                                                                                                                                                                                                                                                           | H -0.64839600 1.65911300 1.04724600<br>H -2.02926100 1.39949700 -0.10308300<br>H 1.27687600 -1.49403900 0.66034500                                                                                                                                                                                                                                                                                                         |
| <b>CH<sub>3</sub>-CO-COH</b><br>O 1.21788500 0.46172200 0.00000000<br>C 0.00000000 0.43924600 0.00000000<br>C -0.71111500 -0.98465200 0.00000000<br>C -0.87875400 1.63171300 0.00000000<br>O 0.25827600 -1.82585100 0.00000000<br>H 1.12727800 -1.31434600 0.00000000<br>H -0.30907100 2.56540400 0.00000000<br>H -1.54414100 1.57206600 0.87501200<br>H -1.54414100 1.57206600 -0.87501200                    | <b>CH<sub>3</sub>-CO-COH<sup>+</sup></b><br>O 1.18661800 0.59595000 0.00000000<br>C 0.00000000 0.56290100 0.00000000<br>C -0.49988200 -1.00995800 0.00000000<br>C -1.06044100 1.57462700 0.00000000<br>O 0.32717500 -1.91445500 0.00000000<br>H 1.28085300 -1.62218600 0.00000000<br>H -0.62833600 2.57993600 0.00000000<br>H -1.70046300 1.41243500 0.88295900<br>H -1.70046300 1.41243500 -0.88295900                    |
| <b>H<sub>2</sub></b><br>H 0.00000000 0.00000000 0.38053400<br>H 0.00000000 0.00000000 -0.38053400                                                                                                                                                                                                                                                                                                              | <b>H<sub>2</sub><sup>+</sup></b><br>H 0.00000000 0.00000000 0.55643600<br>H 0.00000000 0.00000000 -0.55643600                                                                                                                                                                                                                                                                                                              |
| <b>H<sub>2</sub>C<sub>2</sub>O</b><br>C 0.00031300 1.21222200 0.00000000<br>C 0.00000000 -0.10347600 0.00000000<br>O -0.00028900 -1.26773400 0.00000000<br>H 0.94692100 1.74492400 0.00000000<br>H -0.94648400 1.74447100 0.00000000                                                                                                                                                                           | <b>H<sub>2</sub>C<sub>2</sub>O<sup>+</sup></b><br>C 0.00176500 1.24269100 0.00000000<br>C 0.00000000 -0.14037100 0.00000000<br>O -0.00186800 -1.26799700 0.00000000<br>H 0.96537000 1.76442500 0.00000000<br>H -0.96101600 1.76563300 0.00000000                                                                                                                                                                           |
| <b>H<sub>2</sub>CO<sub>2</sub></b><br>C -0.13183300 0.39960700 0.00019400<br>H -0.10130500 1.50351100 0.00022100<br>O 1.11544700 -0.09181400 -0.00021000<br>H 1.03988300 -1.05941000 0.00109800<br>O -1.13389500 -0.26340400 -0.00010000                                                                                                                                                                       | <b>H<sub>2</sub>CO<sub>2</sub><sup>+</sup></b><br>C -0.08366600 0.39748200 0.00001300<br>H -0.20963100 1.50065300 0.00005200<br>O 1.09191800 -0.08394500 -0.00002500<br>H 1.14248100 -1.06417500 0.00013500<br>O -1.14577500 -0.26872700 -0.00000800                                                                                                                                                                       |
| <b>CH<sub>2</sub>-CO-CO<sub>2</sub>H-1</b><br>O 1.34319500 -1.23162200 -0.00000500<br>C 0.78527200 -0.13201700 -0.00007000<br>C -0.74976900 -0.10446900 -0.00021600<br>C 1.50794100 1.09406000 0.00007000<br>O -1.23801600 1.15390000 -0.00027300<br>O -1.43760600 -1.08748600 0.00041500<br>H 1.00636200 2.05917100 -0.00000400<br>H 2.59607200 1.04218900 0.00026500<br>H -2.20369300 1.07485600 -0.00006200 |                                                                                                                                                                                                                                                                                                                                                                                                                            |
| <b>CH<sub>2</sub>-CO-CO<sub>2</sub>H-2</b><br>O 1.12687800 -1.36491800 -0.00009700<br>C 0.76885400 -0.18449700 0.00003600<br>C -0.71879300 0.18130200 0.00000500<br>C 1.67591600 0.91182100 0.00008700<br>O -1.50463400 -0.89549100 0.00001900<br>O -1.12155900 1.32117100 -0.00004100<br>H 1.31342800 1.93781800 0.00015500<br>H 2.74341300 0.69737000 0.00004900<br>H -2.41817200 -0.57303300 -0.00001300    | <b>CH<sub>2</sub>-CO-CO<sub>2</sub>H-2<sup>+</sup></b><br>O 1.56589900 -1.27065400 0.00011200<br>C 0.84709200 -0.34334100 -0.00008900<br>C -0.69561600 -0.11847900 0.00009800<br>C 0.90432100 1.18790100 -0.00033200<br>O -1.74255900 -0.81709200 -0.00015300<br>O -0.60819000 1.16427700 0.00045900<br>H 1.26224400 1.66801200 0.91666900<br>H 1.26095000 1.66859500 -0.91757000<br>H -2.57917900 -0.30534300 -0.00051200 |
| <b>CH<sub>2</sub>-COH-CO<sub>2</sub></b>                                                                                                                                                                                                                                                                                                                                                                       | <b>CH<sub>2</sub>-COH-CO<sub>2</sub><sup>+</sup></b>                                                                                                                                                                                                                                                                                                                                                                       |

|                                                                                                                                                                                                                                                                                                                                                                                                  |                                                                                                                                                                                                                                                                                                                                                                                                              |
|--------------------------------------------------------------------------------------------------------------------------------------------------------------------------------------------------------------------------------------------------------------------------------------------------------------------------------------------------------------------------------------------------|--------------------------------------------------------------------------------------------------------------------------------------------------------------------------------------------------------------------------------------------------------------------------------------------------------------------------------------------------------------------------------------------------------------|
| O -1.26098600 -1.21799500 0.00053300<br>C -0.73983200 0.02609000 0.00005000<br>C 0.73634100 0.05101000 0.00000100<br>C -1.46339600 1.15022200 -0.00041600<br>O 1.44380400 1.11249000 0.00051400<br>O 1.42079500 -0.98841300 -0.00055100<br>H -0.95072200 2.10972900 -0.00066700<br>H -2.55121100 1.12865600 -0.00051600<br>H -0.52564700 -1.85096800 -0.00060100                                 | O -1.72724100 -0.88477700 -0.00006600<br>C -0.73007300 -0.13988000 0.00010100<br>C 0.81015400 -0.26145600 0.00009600<br>C -0.55196000 1.32868200 -0.00006400<br>O 0.89743000 1.09452700 0.00001500<br>O 1.59615100 -1.13602200 -0.00007100<br>H -0.89504800 1.84564200 -0.90940800<br>H -0.89513900 1.84543000 0.90941400<br>H -1.50925600 -1.84497800 0.00017200                                            |
| <b>CH-COH-CO<sub>2</sub>H</b><br>O -1.47872300 -1.00758800 0.00007200<br>C -0.77142300 0.14886600 -0.00008200<br>C 0.69921300 -0.07743100 -0.00003800<br>C -1.30116300 1.36260500 -0.00012000<br>O 1.44460600 1.02824800 0.00003700<br>O 1.15360900 -1.20458400 0.00004900<br>H -2.27228200 1.84354600 -0.00009900<br>H -0.81313100 -1.71816000 0.00015600<br>H 2.36971900 0.74176500 0.00012500 | <b>CH-COH-CO<sub>2</sub>H<sup>+</sup></b><br>O -1.78519900 -0.54918900 0.00014000<br>C -0.81662600 0.31284500 -0.00016700<br>C 0.66770400 -0.28725400 -0.00001000<br>C -0.67808300 1.58930300 0.00003200<br>O 1.59624000 0.63347100 0.00016700<br>O 0.71976500 -1.47212200 -0.00014600<br>H -0.36321500 2.62705900 -0.00064700<br>H -1.41108200 -1.45346000 0.00018600<br>H 2.48987900 0.23975900 0.00003500 |
| <b>CH<sub>2</sub>COH</b><br>C 1.16782100 -0.17184500 -0.00000500<br>C -0.13387400 0.40798300 -0.00000200<br>O -1.16760900 -0.26627000 0.00000000<br>H 2.06156700 0.45305500 0.00000300<br>H 1.26898000 -1.25762000 0.00002400<br>H -0.19335200 1.51789300 0.00001800                                                                                                                             | <b>C<sub>2</sub>H<sub>3</sub>O<sup>+</sup></b><br>C -0.74601500 -0.48304100 0.00000000<br>C 0.00000000 0.73776700 0.00000000<br>O 0.81428200 -0.19298100 0.00000000<br>H -1.07815200 -0.90679900 0.95049900<br>H -1.07815200 -0.90679900 -0.95049900<br>H 0.11814100 1.82909300 0.00000000                                                                                                                   |
| <b>CH<sub>2</sub>C-OH</b><br>C -1.24522800 0.10156600 0.01641200<br>C -0.02454100 -0.40439200 -0.01114800<br>O 1.16634100 0.18737400 -0.07004900<br>H -2.11113900 -0.55032000 -0.07227600<br>H -1.40394900 1.17755800 0.14398200<br>H 1.80297200 -0.30927200 0.45710100                                                                                                                          | <b>CH<sub>2</sub>C-OH<sup>+</sup></b><br>C -1.28657500 -0.00001400 0.00990600<br>C -0.00740000 -0.00035400 0.01294500<br>O 1.21234400 0.00003000 -0.11333300<br>H -1.83349000 -0.95084000 0.02170400<br>H -1.83048300 0.95271200 0.02165000<br>H 1.72907100 0.00009200 0.72620400                                                                                                                            |
